# Supplementary material for: Base-iodine-promoted metal-catalyst-free reactions of [60]fullerene with β-keto esters for the selective formation of [60]fullerene derivatives
Source: Royal Society of Chemistry journal article supplement (doi:10.1039/d0ra04996d), 2020-01-01
Supplement: d0ra04996d1.pdf [file d0ra04996d1.pdf]

Electronic Supplementary Information

**Base-iodine-promoted metal-catalyst-free reactions of [60]fullerene  
with  $\beta$ -keto esters for selective formation of [60]fullerene derivatives**

Han-Lin Yang<sup>a</sup>, Li-Jun Xu<sup>b,c</sup>, Wen-Zhong Li<sup>a</sup>, Tao Sun<sup>d</sup>, Bao-Rong Duan<sup>a</sup>, Si Chen<sup>\*a</sup> and Xiang Gao<sup>b</sup>

<sup>a</sup>College of Chemistry and Chemical Engineering, Yantai University 30 Qingquan Road, Yantai, Shandong 264005, China

<sup>b</sup>State Key Laboratory of Electroanalytical Chemistry, Changchun Institute of Applied Chemistry, Chinese Academy of Sciences, 5625 Renmin Street, Changchun, Jilin 130022, China

<sup>c</sup>University of Science and Technology of China, Hefei, Anhui 230026, China

<sup>d</sup>School of Materials Science and Engineering, Nanyang Technological University, Singapore 639798, Singapore

\* E-mail: [sichen@ytu.edu.cn](mailto:sichen@ytu.edu.cn); [chemchensi@163.com](mailto:chemchensi@163.com)

**Table of Contents**

|                                                       |     |
|-------------------------------------------------------|-----|
| Figure S1. UV-visible spectrum of <b>2a</b>           | S4  |
| Figure S2. MALDI-TOF MS of <b>2a</b>                  | S5  |
| Figure S3. <sup>1</sup> H NMR spectrum of <b>2a</b>   | S6  |
| Figure S4. <sup>13</sup> C NMR spectrum of <b>2a</b>  | S7  |
| Figure S5. UV-visible spectrum of <b>3a</b>           | S8  |
| Figure S6. MALDI-TOF MS of <b>3a</b>                  | S9  |
| Figure S7. <sup>1</sup> H NMR spectrum of <b>3a</b>   | S10 |
| Figure S8. <sup>13</sup> C NMR spectrum of <b>3a</b>  | S11 |
| Figure S9. UV-visible spectrum of <b>2b</b>           | S12 |
| Figure S10. MALDI-TOF MS of <b>2b</b>                 | S13 |
| Figure S11. <sup>1</sup> H NMR spectrum of <b>2b</b>  | S14 |
| Figure S12. <sup>13</sup> C NMR spectrum of <b>2b</b> | S15 |

|                                                       |     |
|-------------------------------------------------------|-----|
| Figure S13. UV-visible spectrum of <b>3b</b>          | S16 |
| Figure S14. MALDI-TOF MS of <b>3b</b>                 | S17 |
| Figure S15. <sup>1</sup> H NMR spectrum of <b>3b</b>  | S18 |
| Figure S16. <sup>13</sup> C NMR spectrum of <b>3b</b> | S19 |
| Figure S17. UV-visible spectrum of <b>2c</b>          | S20 |
| Figure S18. MALDI-TOF MS of <b>2c</b>                 | S21 |
| Figure S19. <sup>1</sup> H NMR spectrum of <b>2c</b>  | S22 |
| Figure S20. <sup>13</sup> C NMR spectrum of <b>2c</b> | S23 |
| Figure S21. UV-visible spectrum of <b>3c</b>          | S24 |
| Figure S22. MALDI-TOF MS of <b>3c</b>                 | S25 |
| Figure S23. <sup>1</sup> H NMR spectrum of <b>3c</b>  | S26 |
| Figure S24. <sup>13</sup> C NMR spectrum of <b>3c</b> | S27 |
| Figure S25. UV-visible spectrum of <b>2d</b>          | S28 |
| Figure S26. MALDI-TOF MS of <b>2d</b>                 | S29 |
| Figure S27. <sup>1</sup> H NMR spectrum of <b>2d</b>  | S30 |
| Figure S28. <sup>13</sup> C NMR spectrum of <b>2d</b> | S31 |
| Figure S29. UV-visible spectrum of <b>3d</b>          | S32 |
| Figure S30. MALDI-TOF MS of <b>3d</b>                 | S33 |
| Figure S31. <sup>1</sup> H NMR spectrum of <b>3d</b>  | S34 |
| Figure S32. <sup>13</sup> C NMR spectrum of <b>3d</b> | S35 |
| Figure S33. UV-visible spectrum of <b>2e</b>          | S36 |
| Figure S34. MALDI-TOF MS of <b>2e</b>                 | S37 |
| Figure S35. <sup>1</sup> H NMR spectrum of <b>2e</b>  | S38 |
| Figure S36. <sup>13</sup> C NMR spectrum of <b>2e</b> | S39 |

|                                                       |     |
|-------------------------------------------------------|-----|
| Figure S37. UV-visible spectrum of <b>3e</b>          | S40 |
| Figure S38. MALDI-TOF MS of <b>3e</b>                 | S41 |
| Figure S39. <sup>1</sup> H NMR spectrum of <b>3e</b>  | S42 |
| Figure S40. <sup>13</sup> C NMR spectrum of <b>3e</b> | S43 |
| Figure S41. UV-visible spectrum of <b>2f</b>          | S44 |
| Figure S42. MALDI-TOF MS of <b>2f</b>                 | S45 |
| Figure S43. <sup>1</sup> H NMR spectrum of <b>2f</b>  | S46 |
| Figure S44. <sup>13</sup> C NMR spectrum of <b>2f</b> | S47 |
| Figure S45. UV-visible spectrum of <b>3f</b>          | S48 |
| Figure S46. MALDI-TOF MS of <b>3f</b>                 | S49 |
| Figure S47. <sup>1</sup> H NMR spectrum of <b>3f</b>  | S50 |
| Figure S48. <sup>13</sup> C NMR spectrum of <b>3f</b> | S51 |

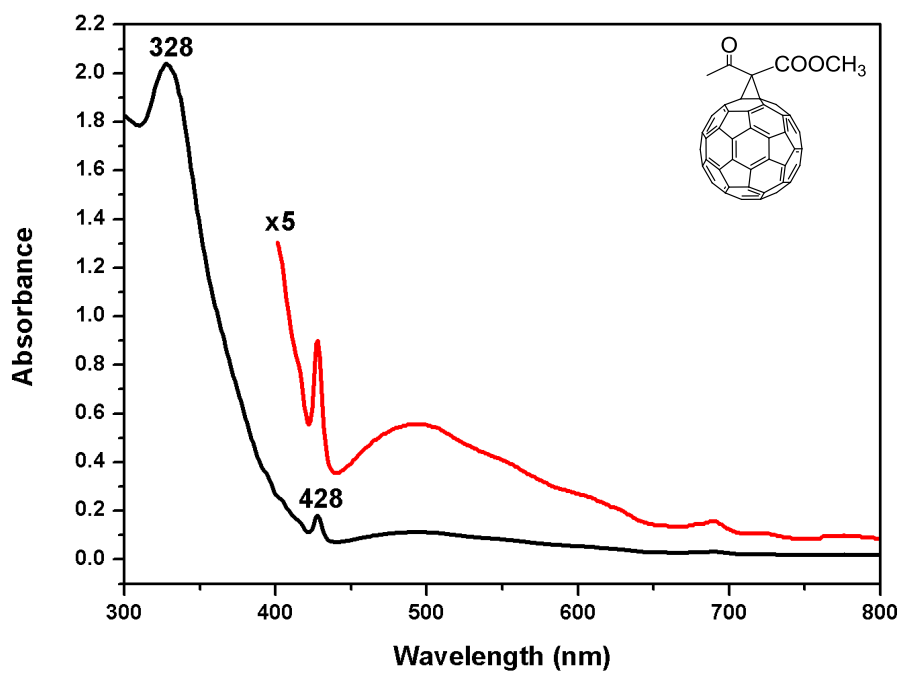

**Figure S1.** UV-visible spectrum of compound **2a** in toluene.

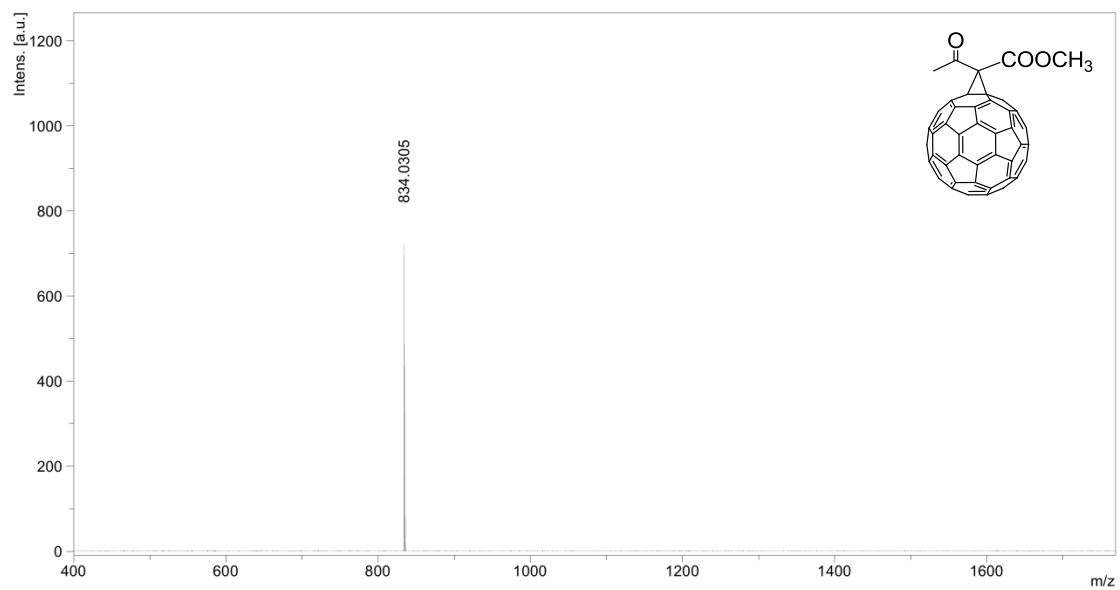

**Figure S2.** MALDI-TOF MS of compound **2a**

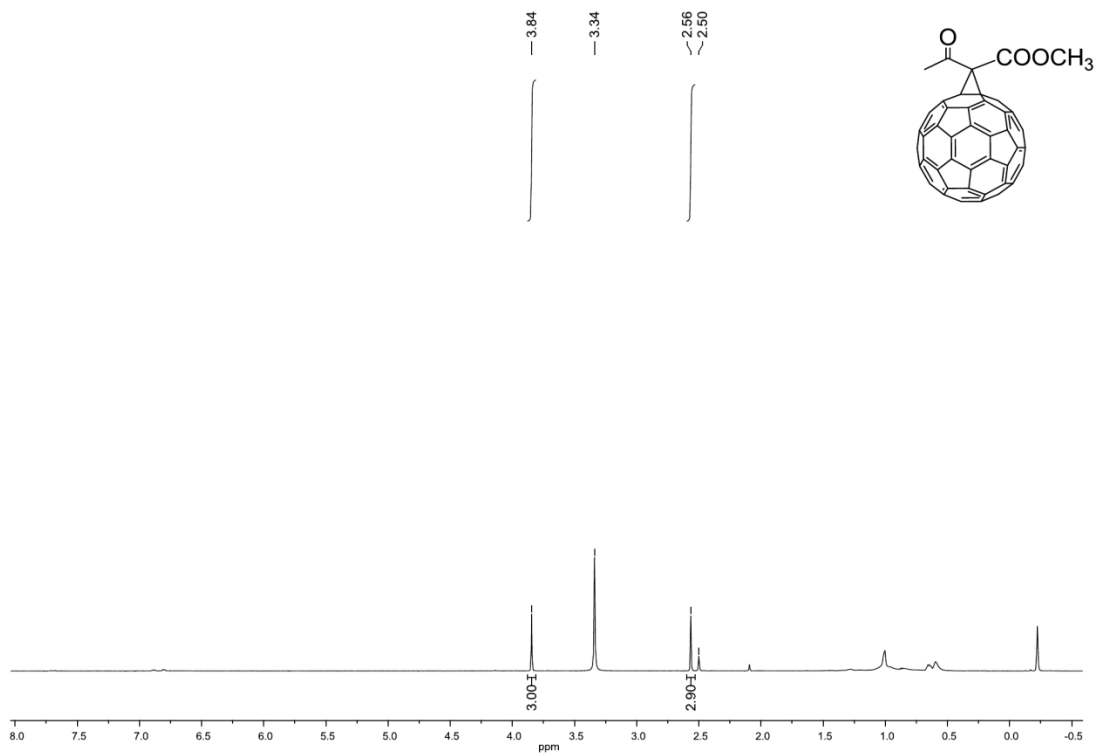

**Figure S3.** <sup>1</sup>H NMR spectrum (600 MHz) of compound **2a** recorded in CS<sub>2</sub> with DMSO-*d*<sub>6</sub> as the external lock. The resonances at 2.5 ppm and 3.3 ppm are due to the DMSO solvent and H<sub>2</sub>O in DMSO respectively.

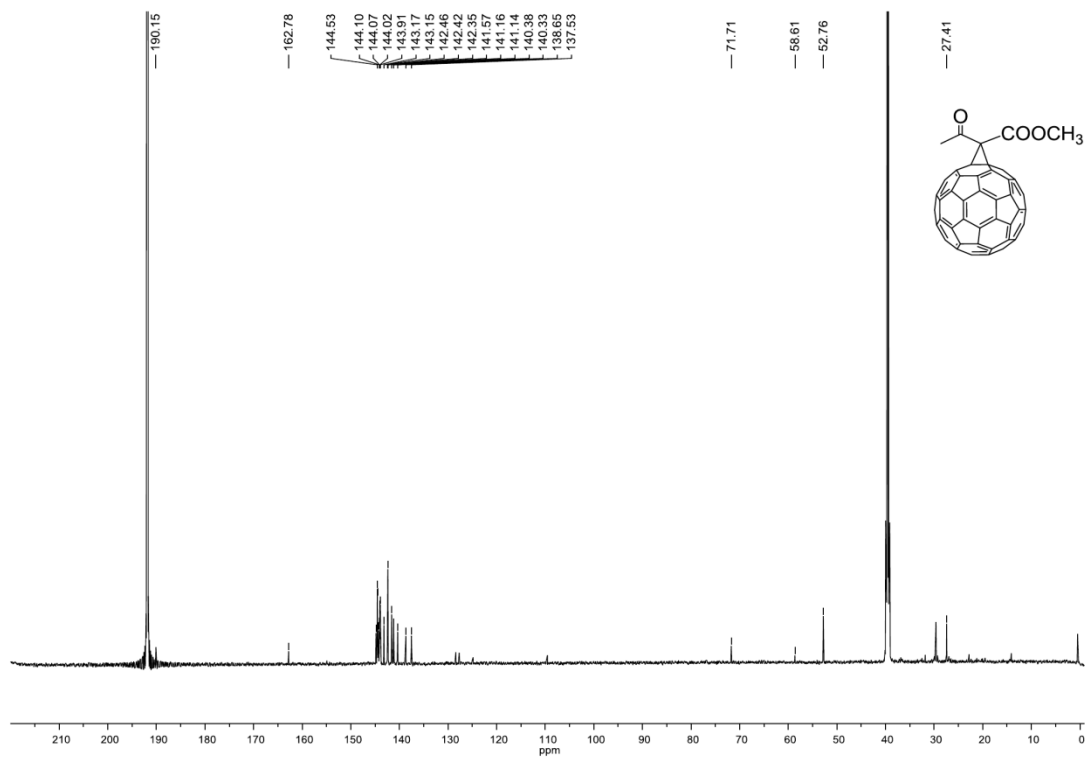

**Figure S4.**  $^{13}\text{C}$  NMR spectrum (151 MHz) of compound **2a** recorded in  $\text{CS}_2$  with  $\text{DMSO-}d_6$  as the external lock.

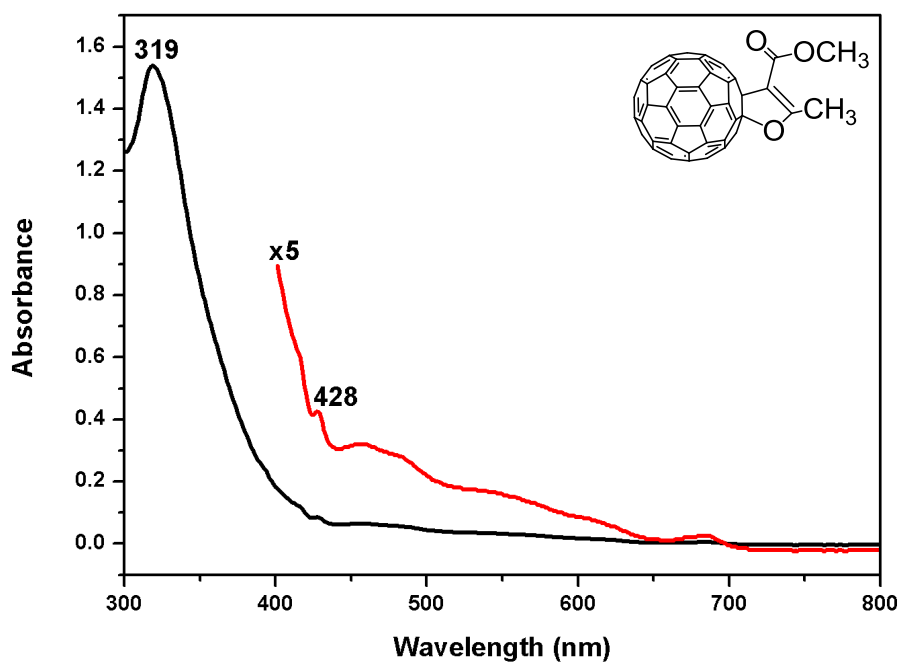

**Figure S5.** UV-visible spectrum of compound **3a** in toluene.



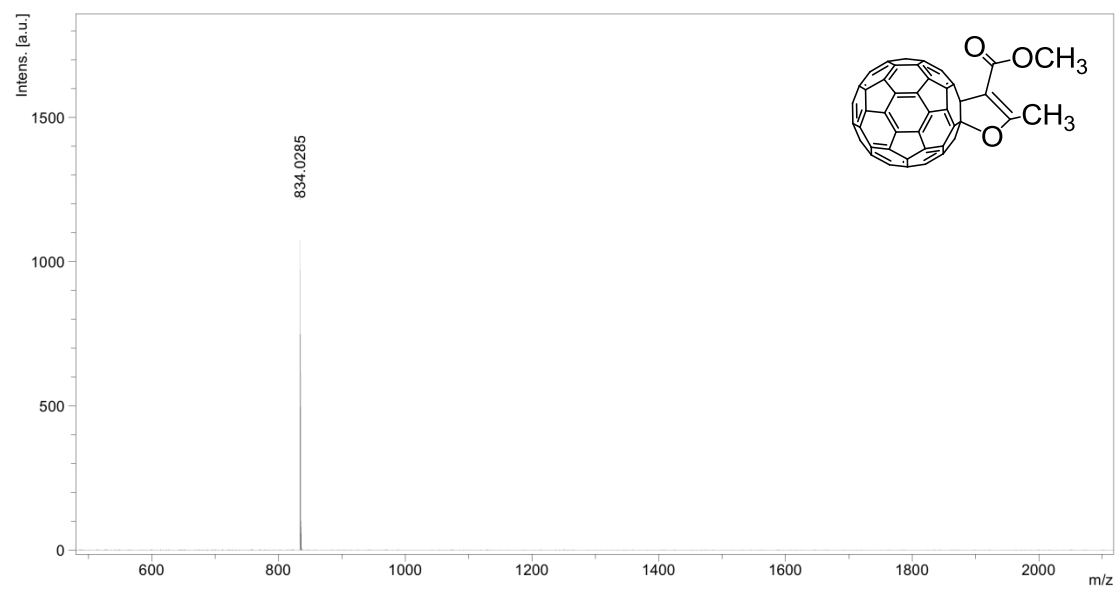

**Figure S6.** MALDI-TOF MS of compound **3a**

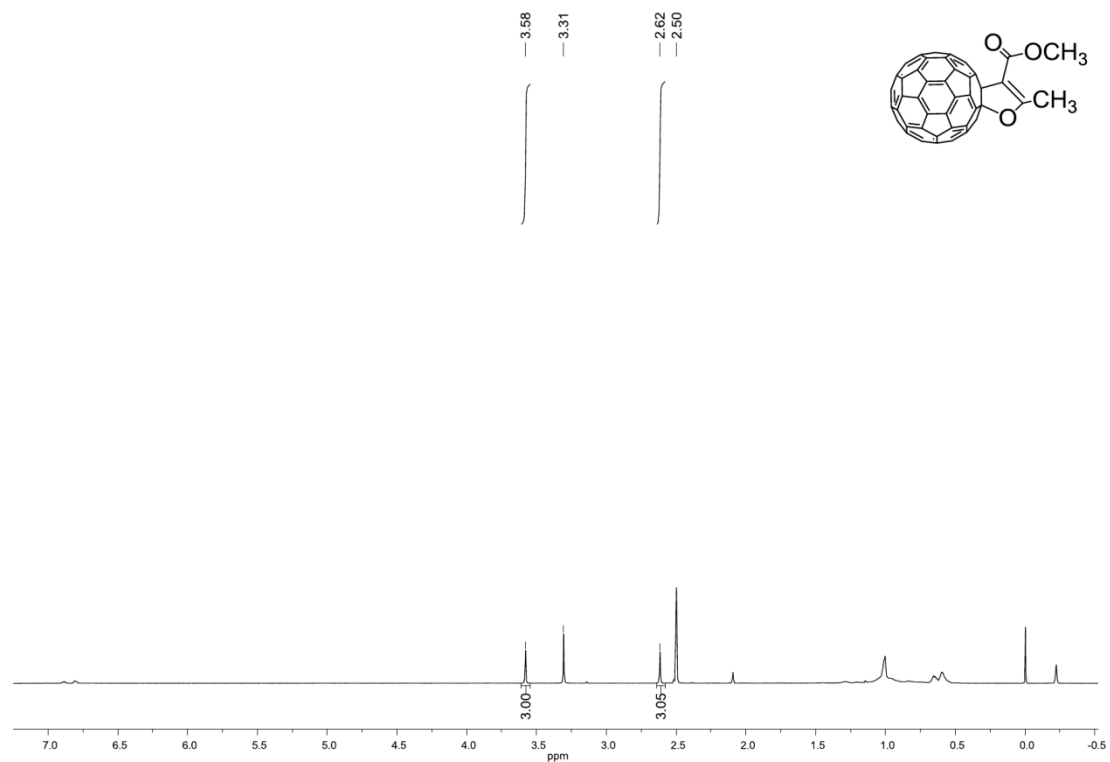

**Figure S7.**  $^1\text{H}$  NMR spectrum (600 MHz) of compound **3a** recorded in  $\text{CS}_2$  with  $\text{DMSO}-d_6$  as the external lock. The resonances at 2.5 ppm and 3.3 ppm are due to the DMSO solvent and  $\text{H}_2\text{O}$  in DMSO respectively.



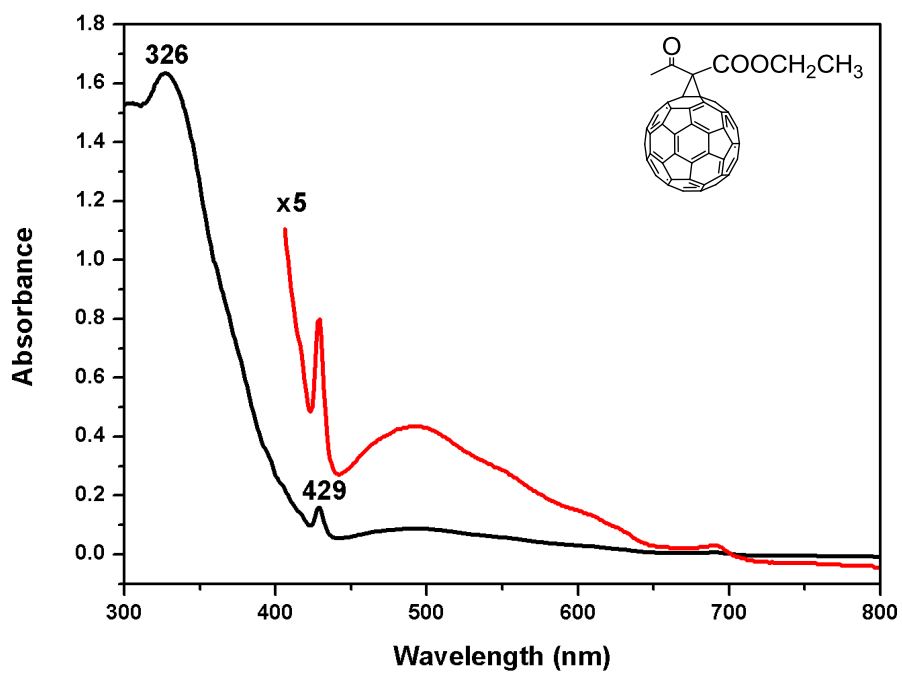

**Figure S9.** UV-visible spectrum of compound **2b** in toluene.

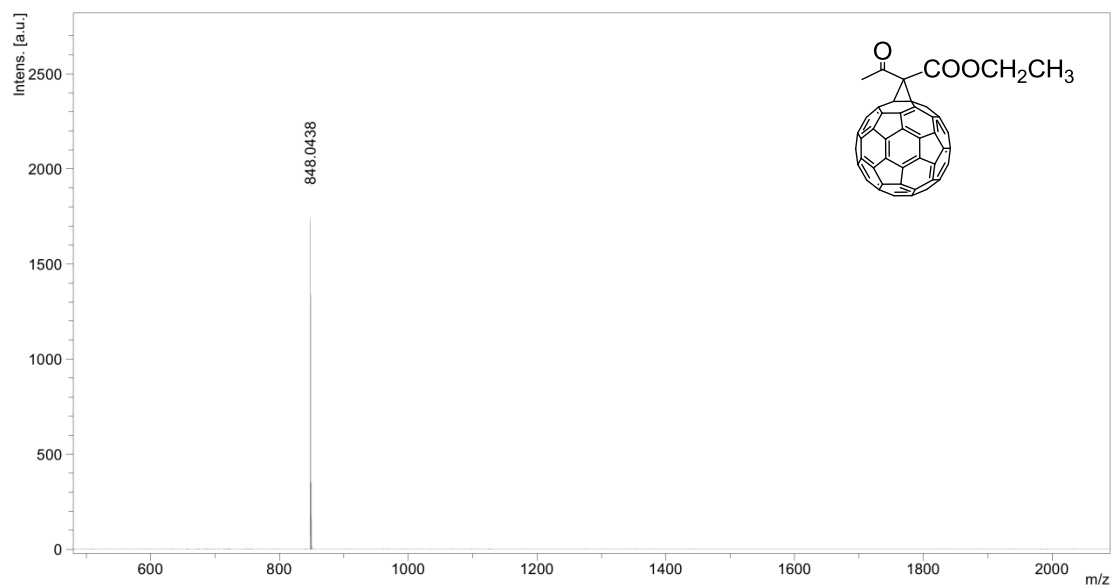

**Figure S10.** MALDI-TOF MS of compound **2b**

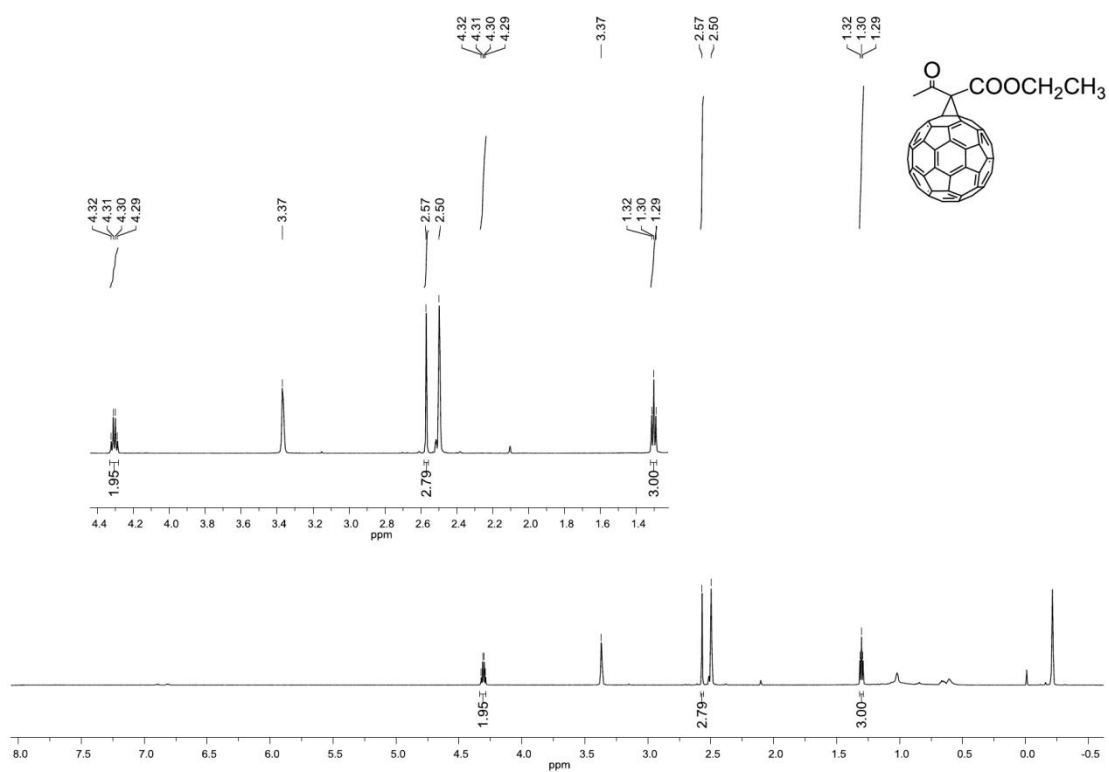

**Figure S11.** <sup>1</sup>H NMR spectrum (600 MHz) of compound **2b** recorded in CS<sub>2</sub> with DMSO-*d*<sub>6</sub> as the external lock. The resonances at 2.5 ppm and 3.3 ppm are due to the DMSO solvent and H<sub>2</sub>O in DMSO respectively.

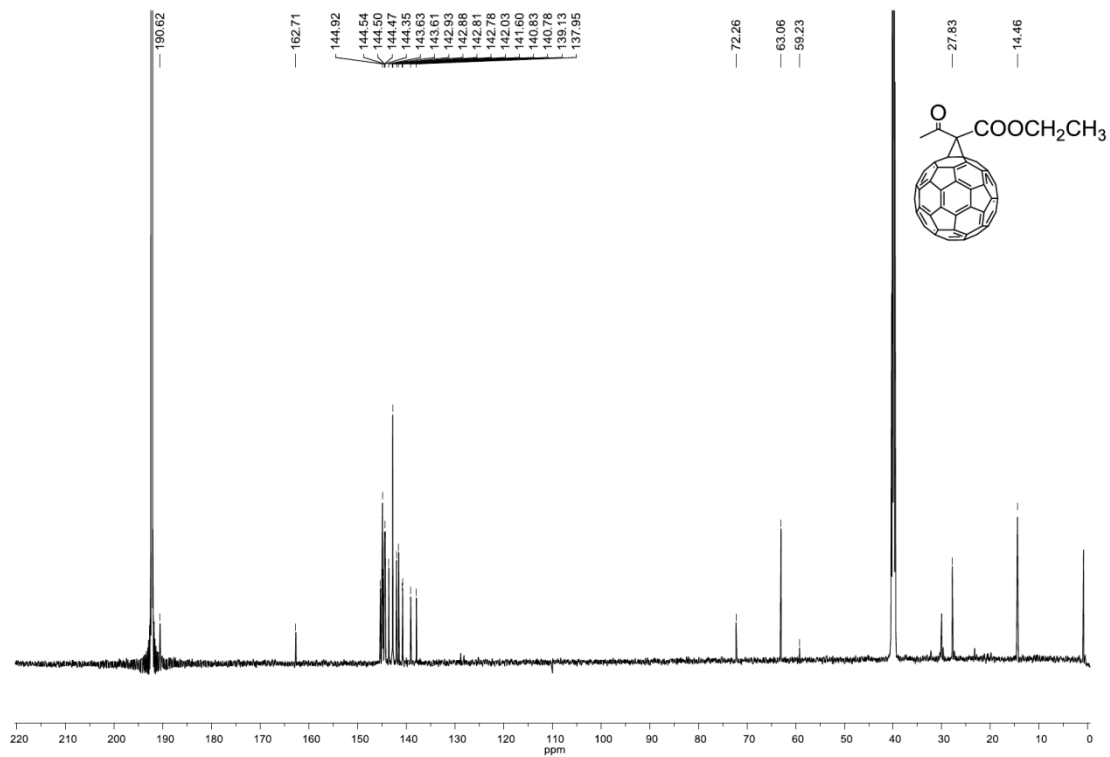

**Figure S12.** <sup>13</sup>C NMR spectrum (151 MHz) of compound **2b** recorded in CS<sub>2</sub> with DMSO-*d*<sub>6</sub> as the external lock.

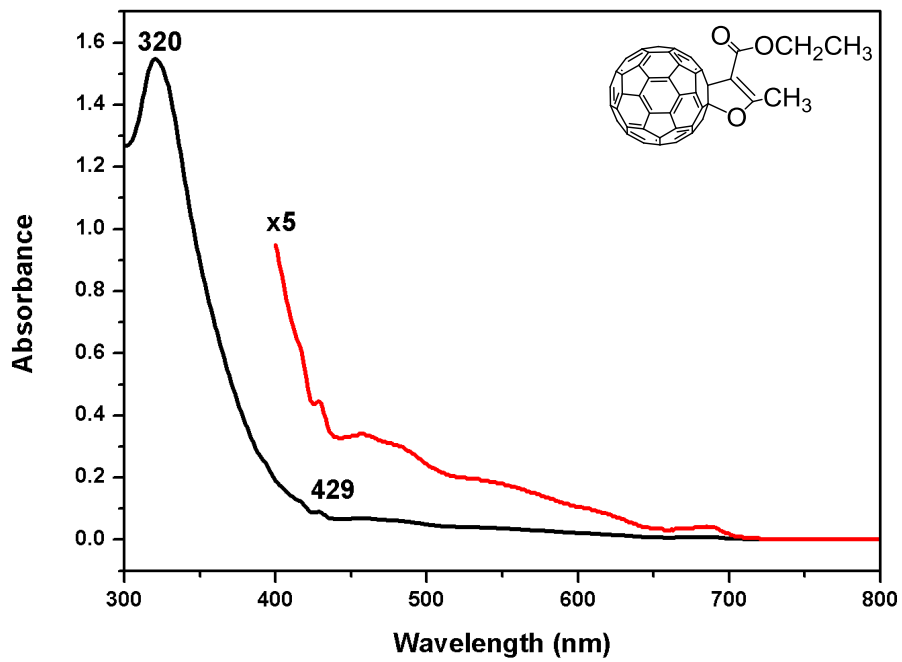

**Figure S13.** UV-visible spectrum of compound **3b** in toluene.



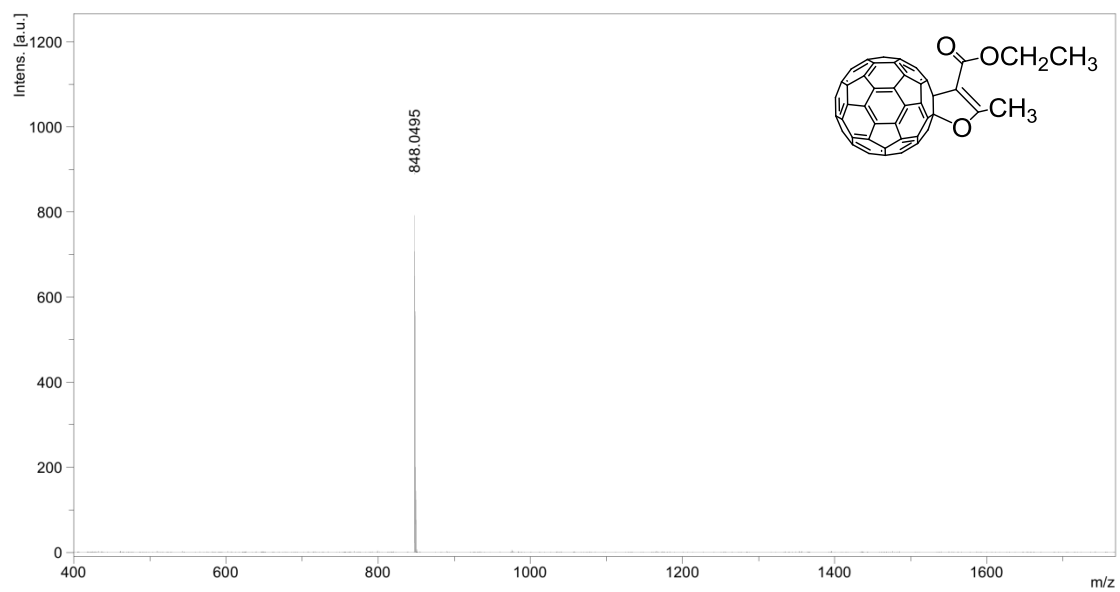

**Figure S14.** MALDI-TOF MS of compound **3b**

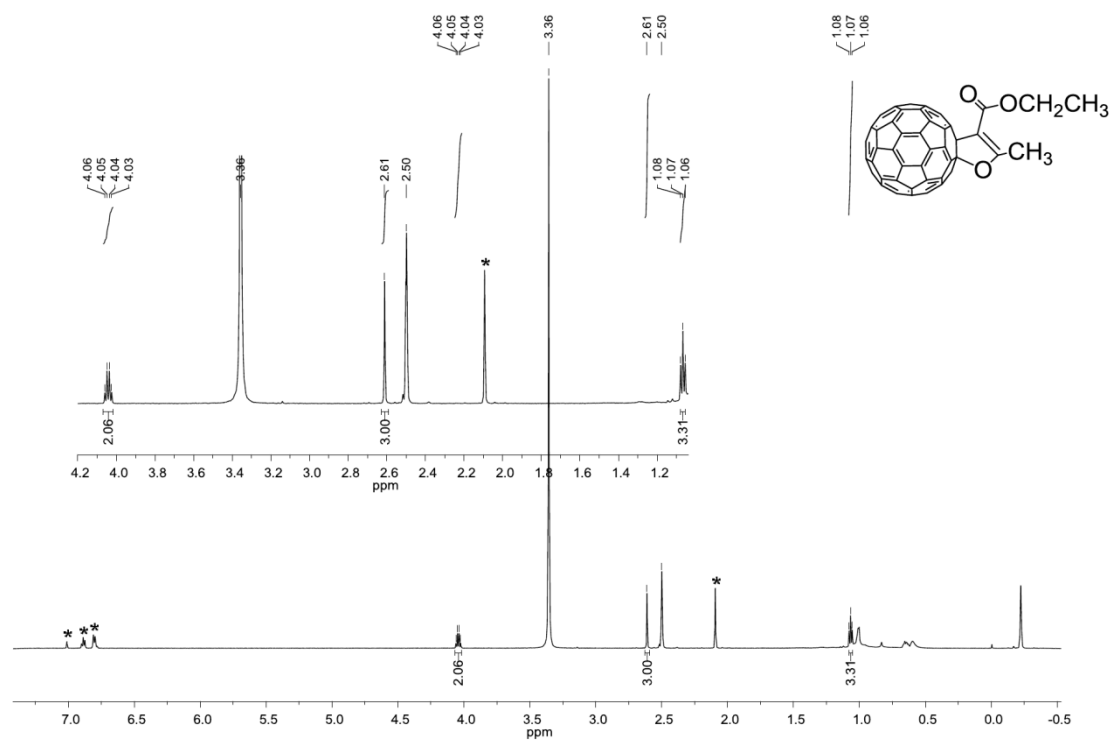

**Figure S15.** <sup>1</sup>H NMR spectrum (600 MHz) of compound **3b** recorded in CS<sub>2</sub> with DMSO-*d*<sub>6</sub> as the external lock. The resonances at 2.5 ppm and 3.3 ppm are due to the DMSO solvent and H<sub>2</sub>O in DMSO respectively. The peaks labeled with asterisks belong to toluene residue in the sample.

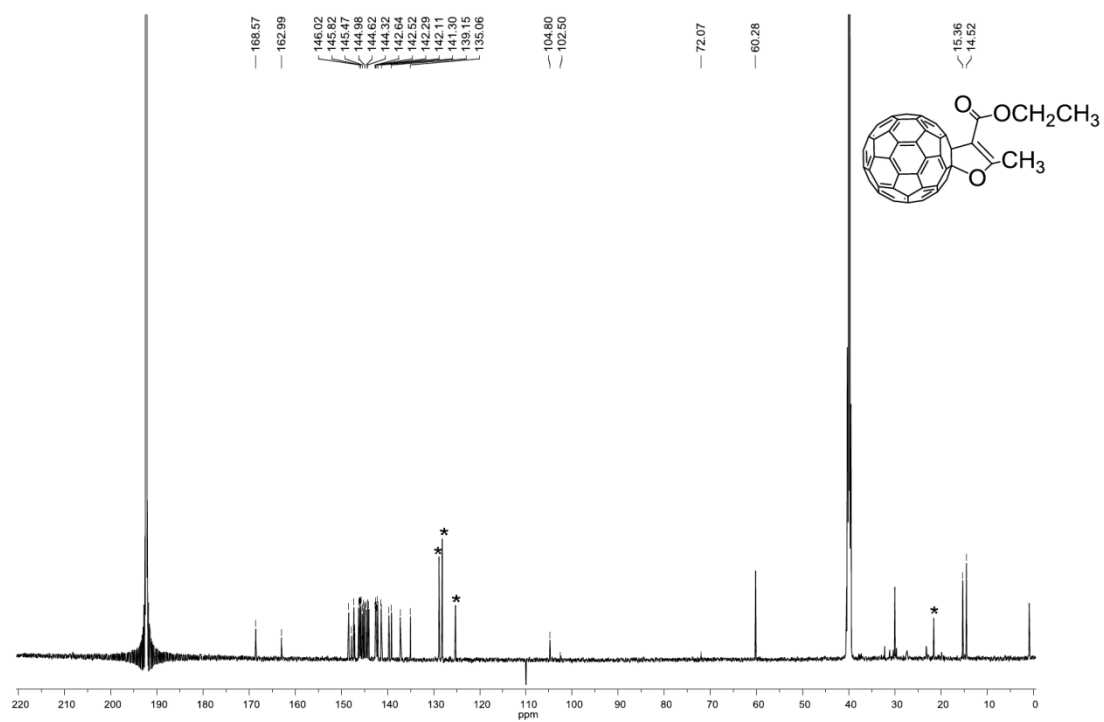

**Figure S16.**  $^{13}\text{C}$  NMR spectrum (151 MHz) of compound **3b** recorded in  $\text{CS}_2$  with  $\text{DMSO-}d_6$  as the external lock. The peaks labeled with asterisks belong to toluene residue in the sample.

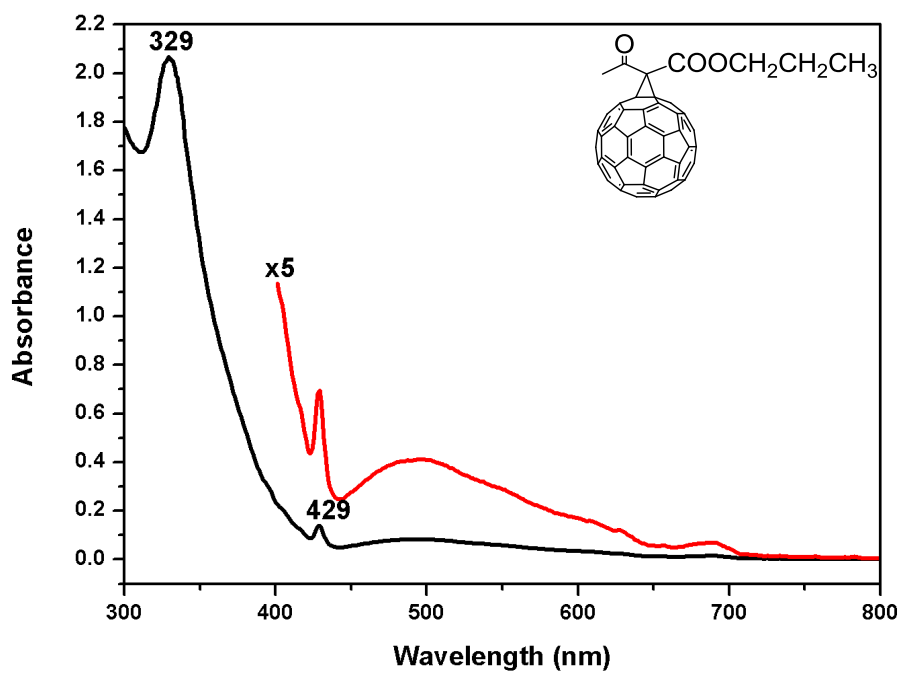

**Figure S17.** UV-visible spectrum of compound **2c** in toluene.

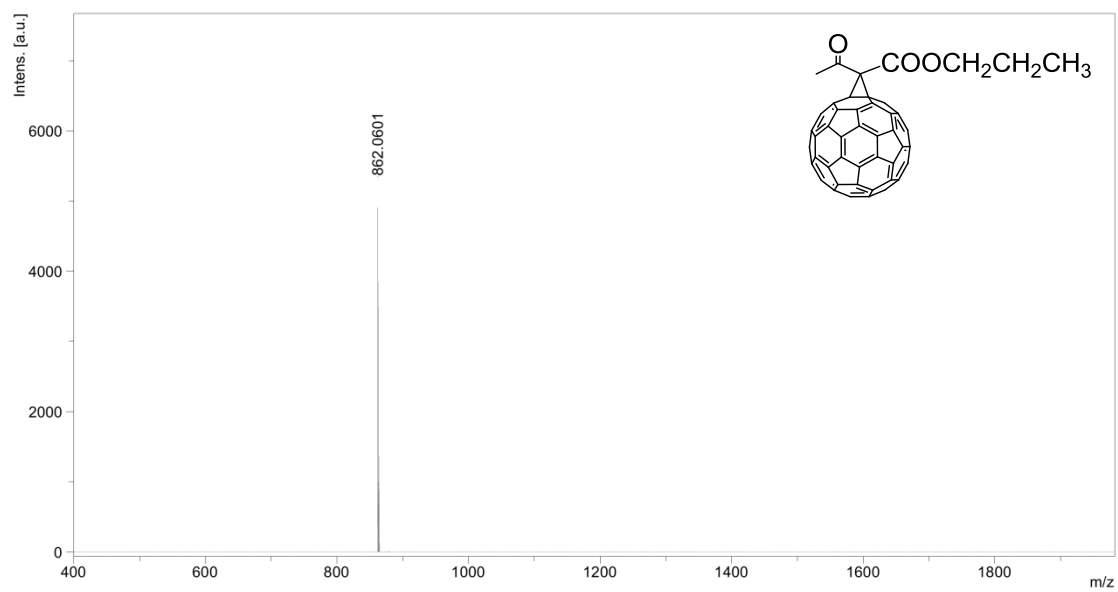

**Figure S18.** MALDI-TOF MS of compound **2c**

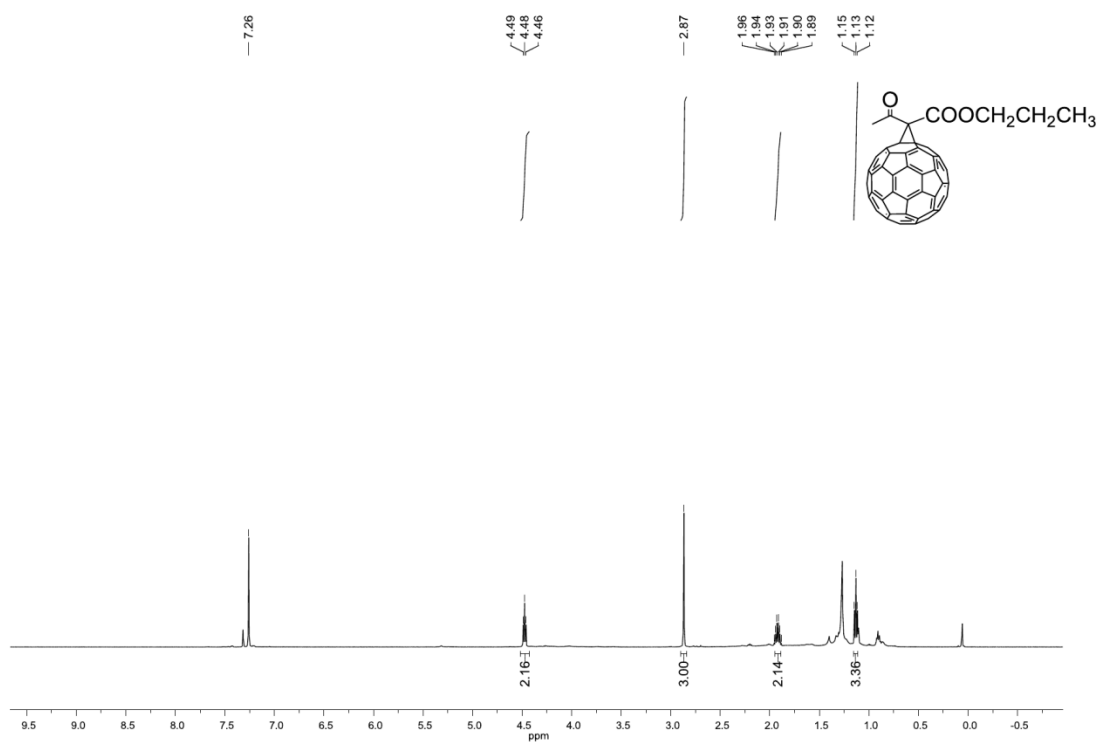

**Figure S19.**  $^1\text{H}$  NMR spectrum (500 MHz) of compound **2c** recorded in  $\text{CS}_2\text{-CDCl}_3$  ( $v/v=2:1$ ). The resonance at 7.26 ppm is due to the  $\text{CHCl}_3$  solvent.

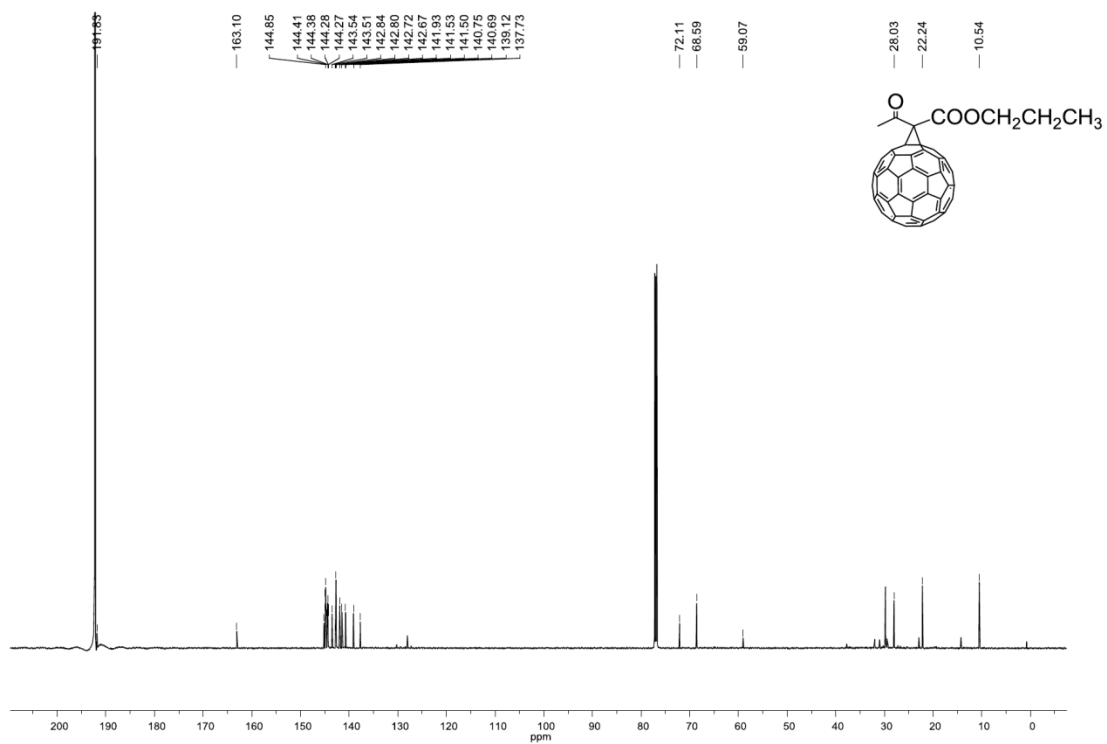

**Figure S20.**  $^{13}\text{C}$  NMR spectrum (151 MHz) of compound **2c** recorded in  $\text{CS}_2\text{-CDCl}_3$  (v/v=2:1).

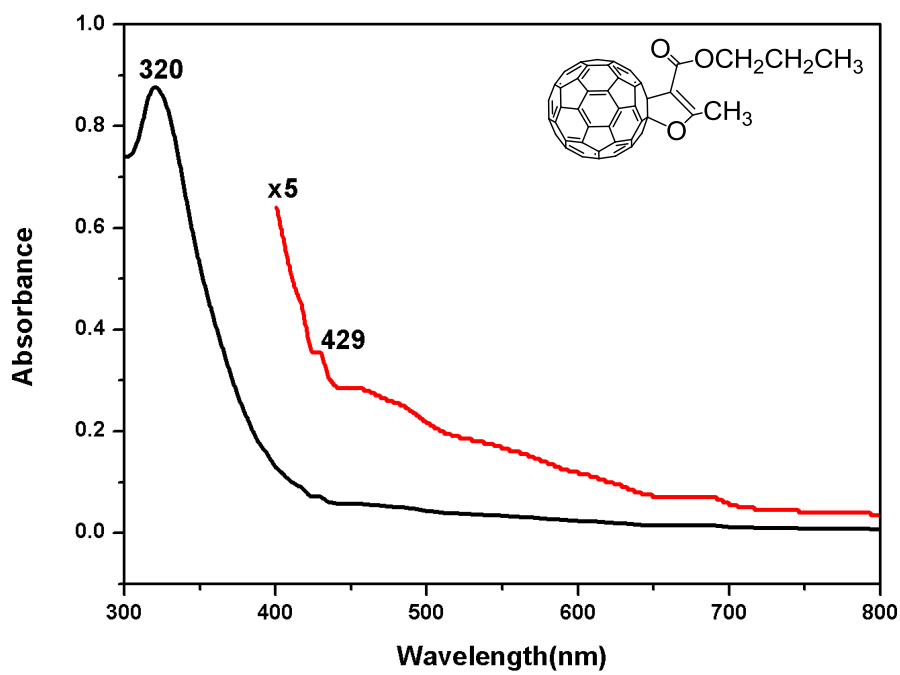

**Figure S21.** UV-visible spectrum of compound **3c** in toluene.



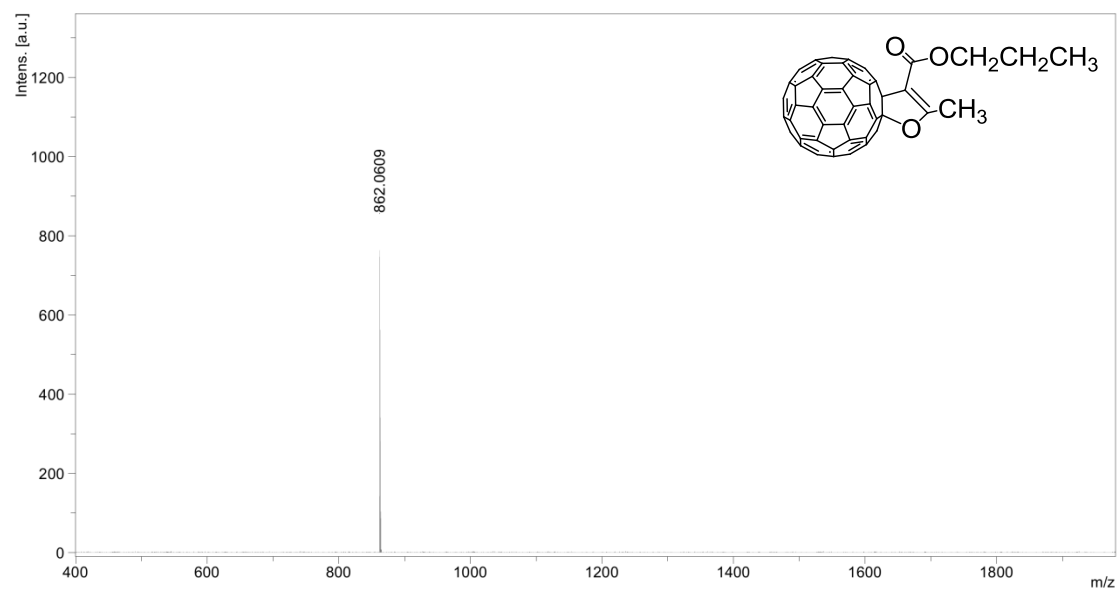

**Figure S22.** MALDI-TOF MS of compound **3c**

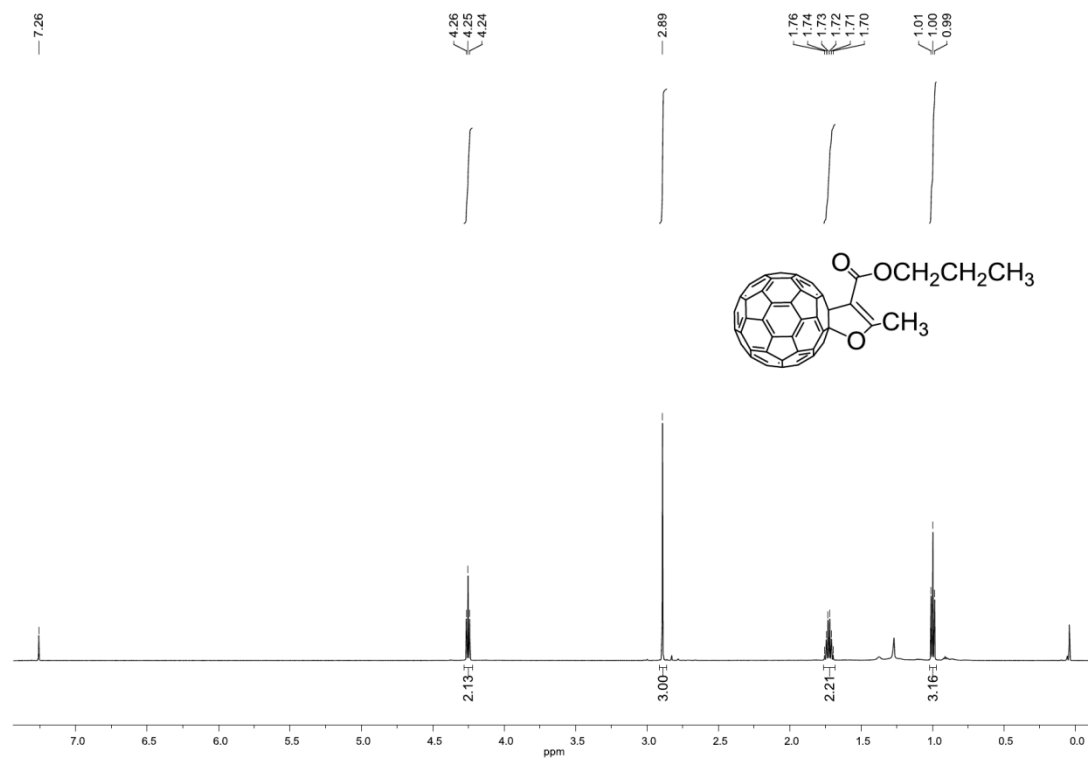

**Figure S23.**  $^1\text{H}$  NMR spectrum (600 MHz) of compound **3c** recorded in  $\text{CS}_2\text{-CDCl}_3$  ( $v/v=2:1$ ). The resonance at 7.26 ppm is due to the  $\text{CHCl}_3$  solvent.

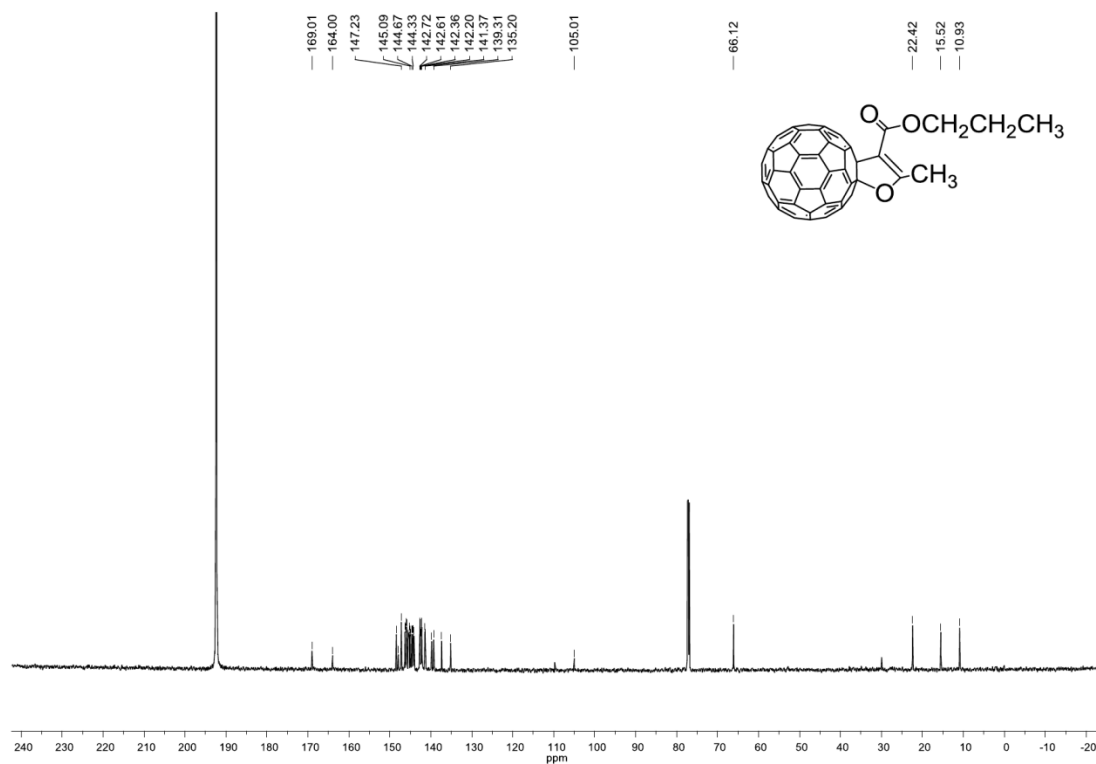

**Figure S24.** <sup>13</sup>C NMR spectrum (151 MHz) of compound **3c** recorded in CS<sub>2</sub>-CDCl<sub>3</sub> (v/v=2:1).

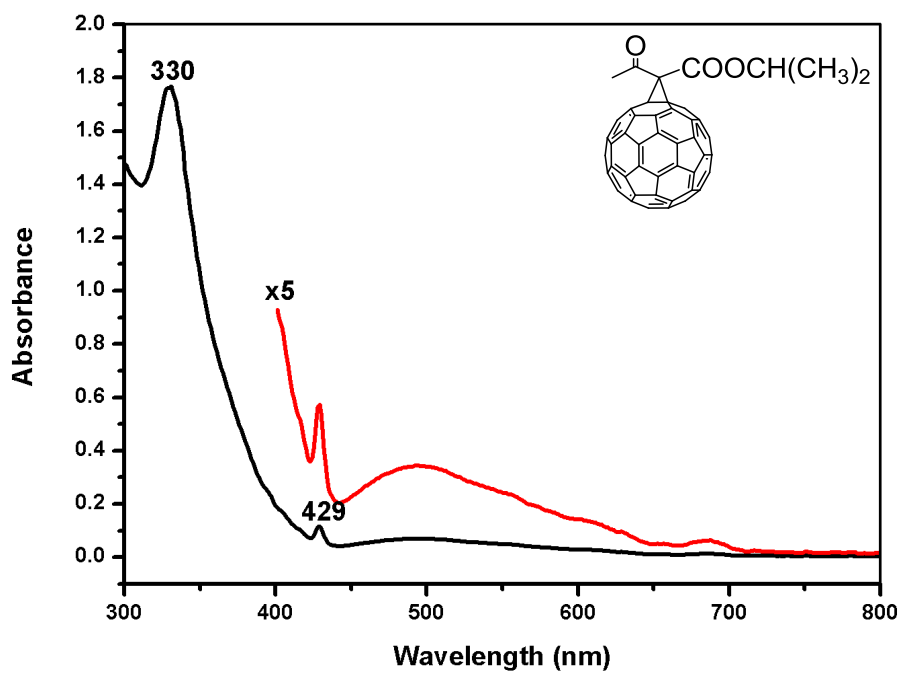

**Figure S25.** UV-visible spectrum of compound **2d** in toluene.

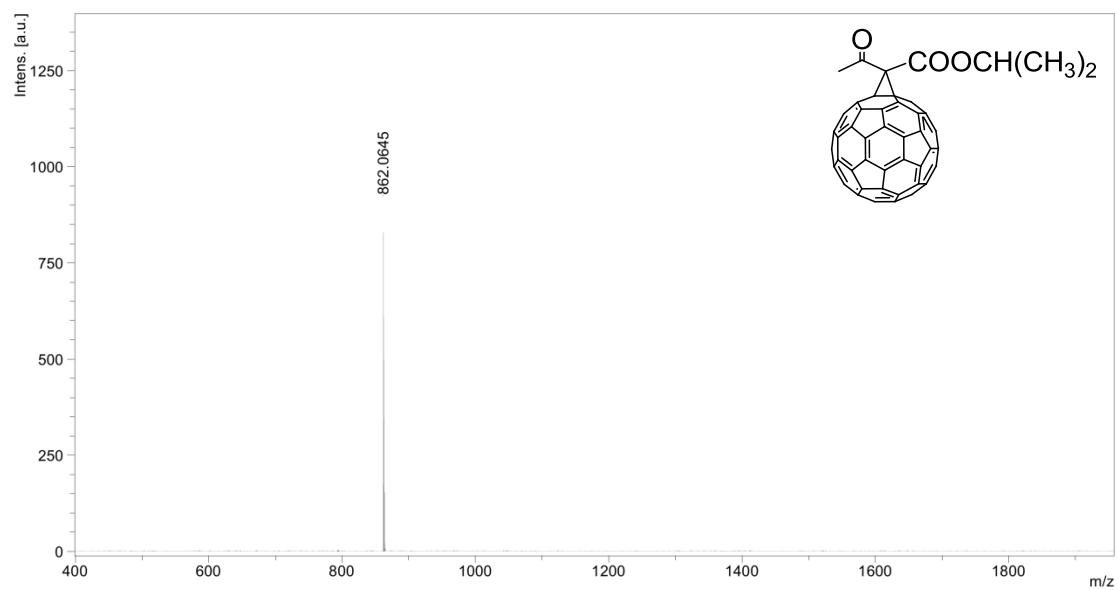

**Figure S26.** MALDI-TOF MS of compound **2d**

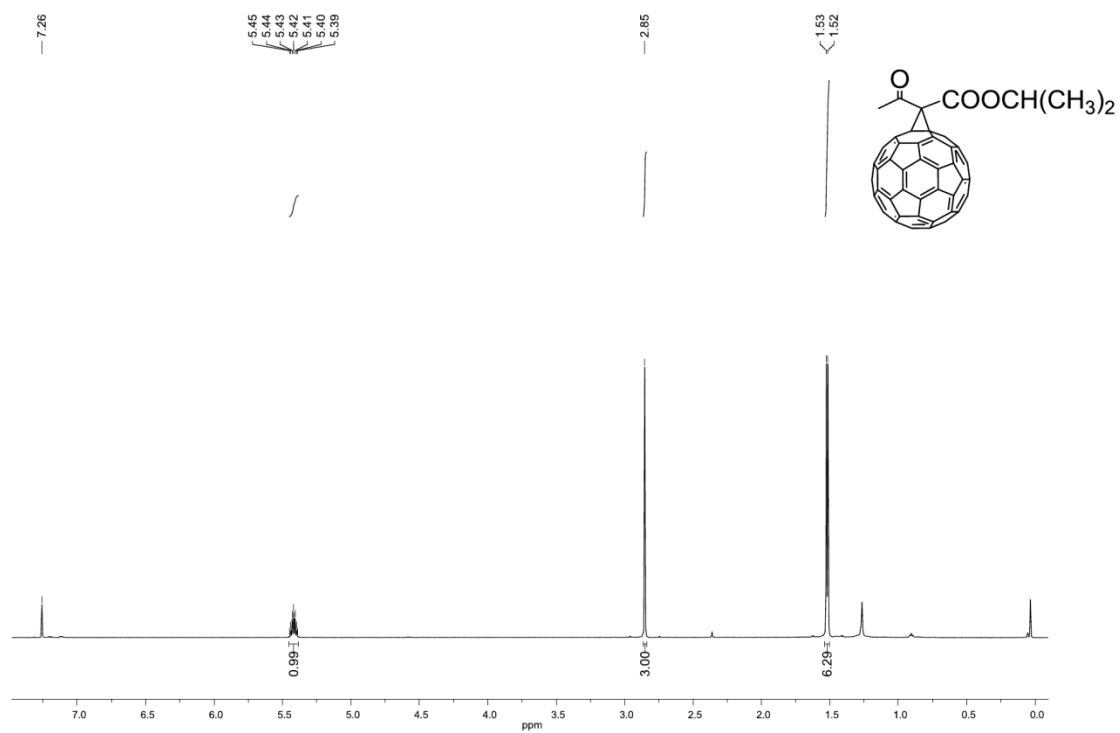

**Figure S27.**  $^1\text{H}$  NMR spectrum (600 MHz) of compound **2d** recorded in  $\text{CS}_2\text{-CDCl}_3$  (v/v=2:1). The resonance at 7.26 ppm is due to the  $\text{CHCl}_3$  solvent.

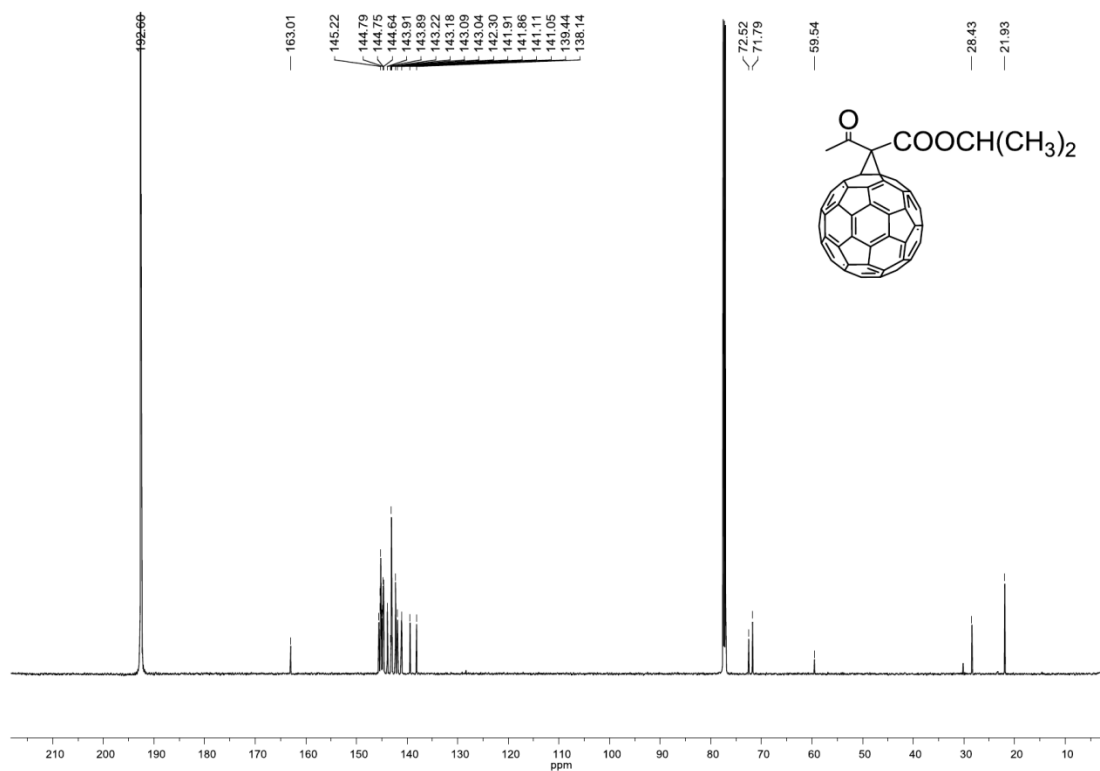

**Figure S28.**  $^{13}\text{C}$  NMR spectrum (151 MHz) of compound **2d** recorded in  $\text{CS}_2\text{-CDCl}_3$  ( $v/v=2:1$ ).

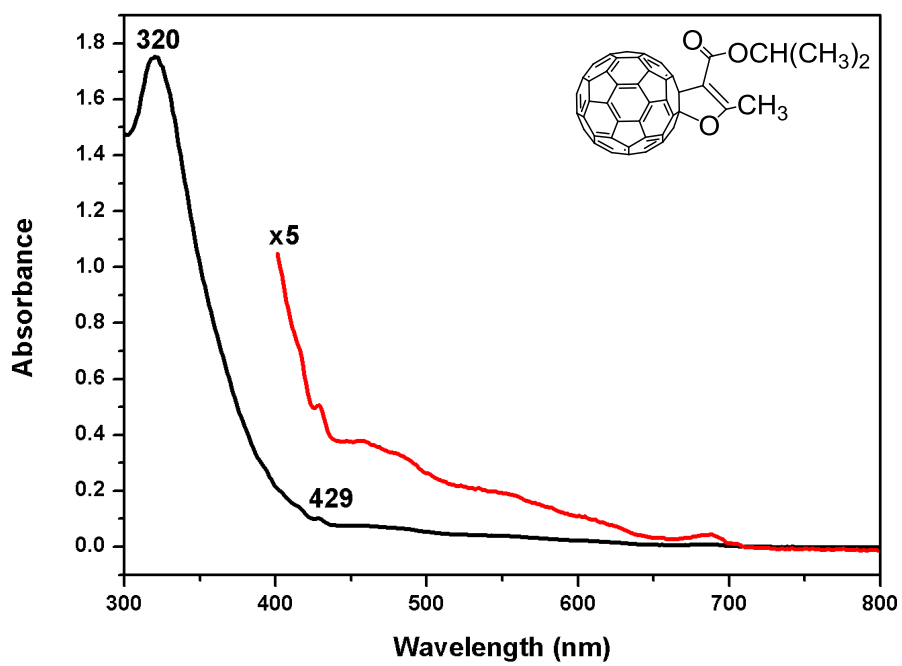

**Figure S29.** UV-visible spectrum of compound **3d** in toluene.



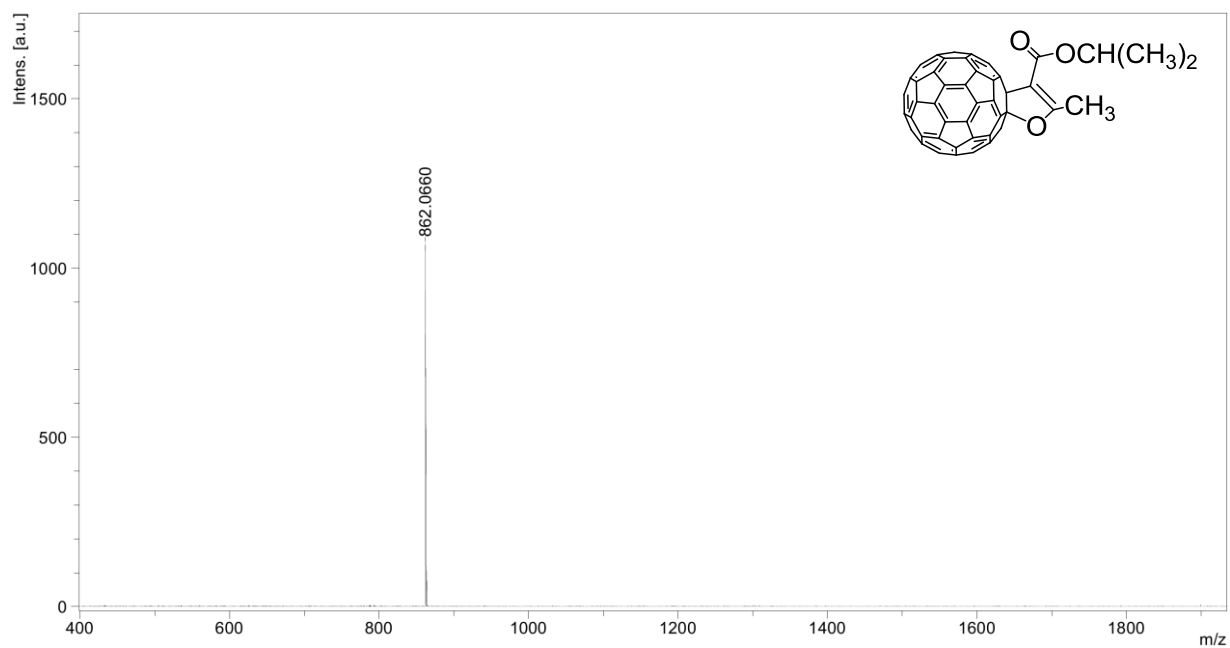

**Figure S30.** MALDI-TOF MS of compound **3d**

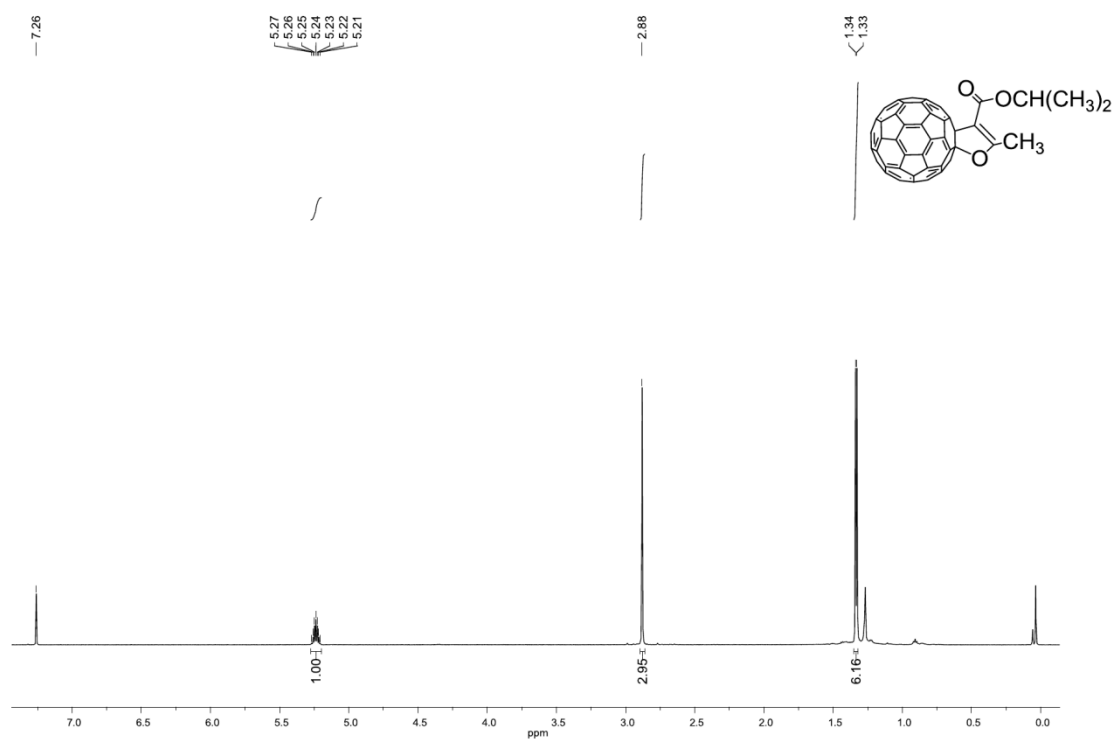

**Figure S31.** <sup>1</sup>H NMR spectrum (600 MHz) of compound **3d** recorded in CS<sub>2</sub>-CDCl<sub>3</sub> (v/v=2:1). The resonance at 7.26 ppm is due to the CHCl<sub>3</sub> solvent.

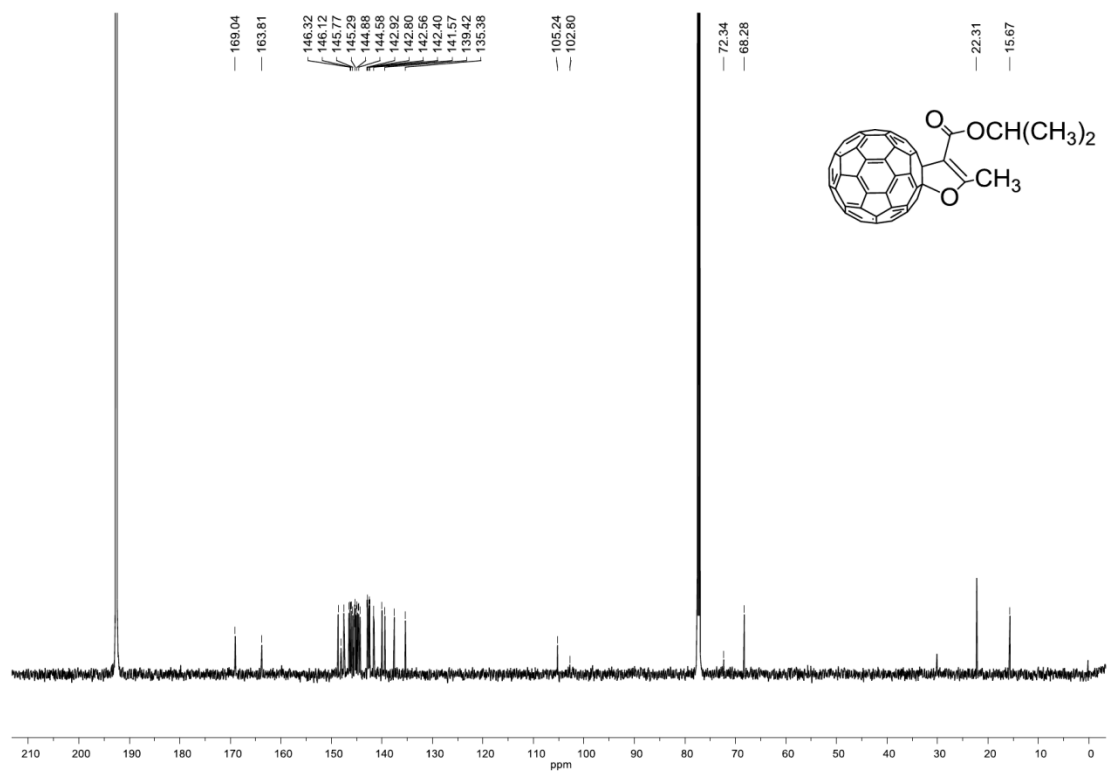

**Figure S32.** <sup>13</sup>C NMR spectrum (151 MHz) of compound **3d** recorded in CS<sub>2</sub>-CDCl<sub>3</sub> (v/v=2:1).

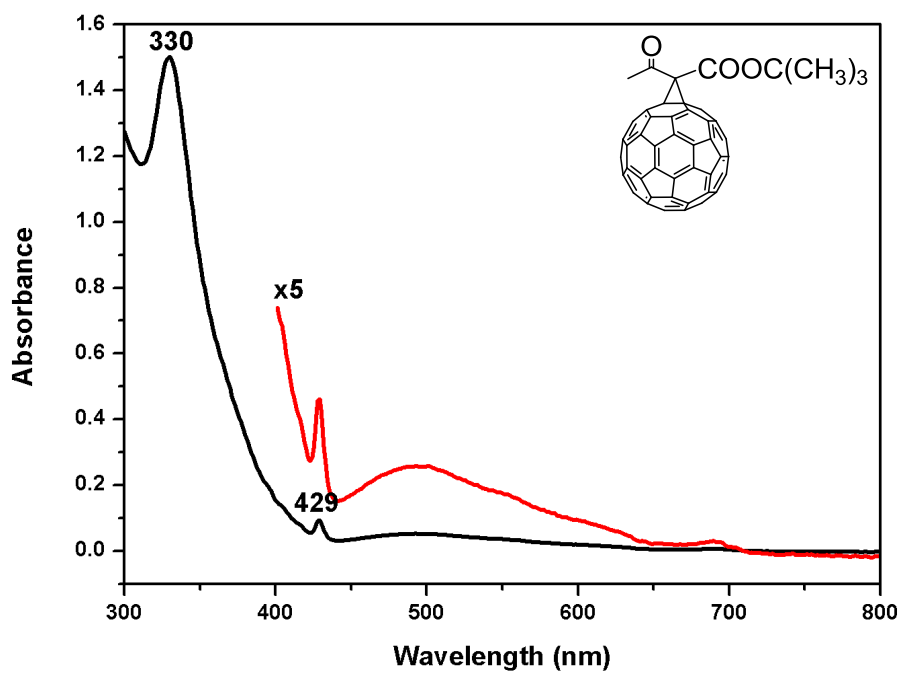

**Figure S33.** UV-visible spectrum of compound **2e** in toluene.

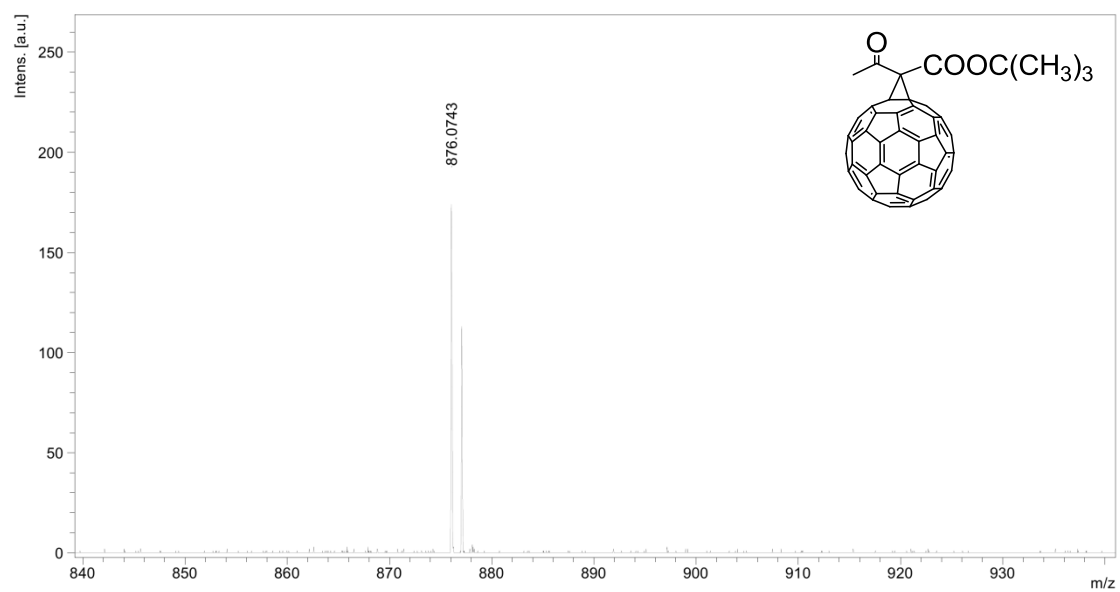

**Figure S34.** MALDI-TOF MS of compound **2e**

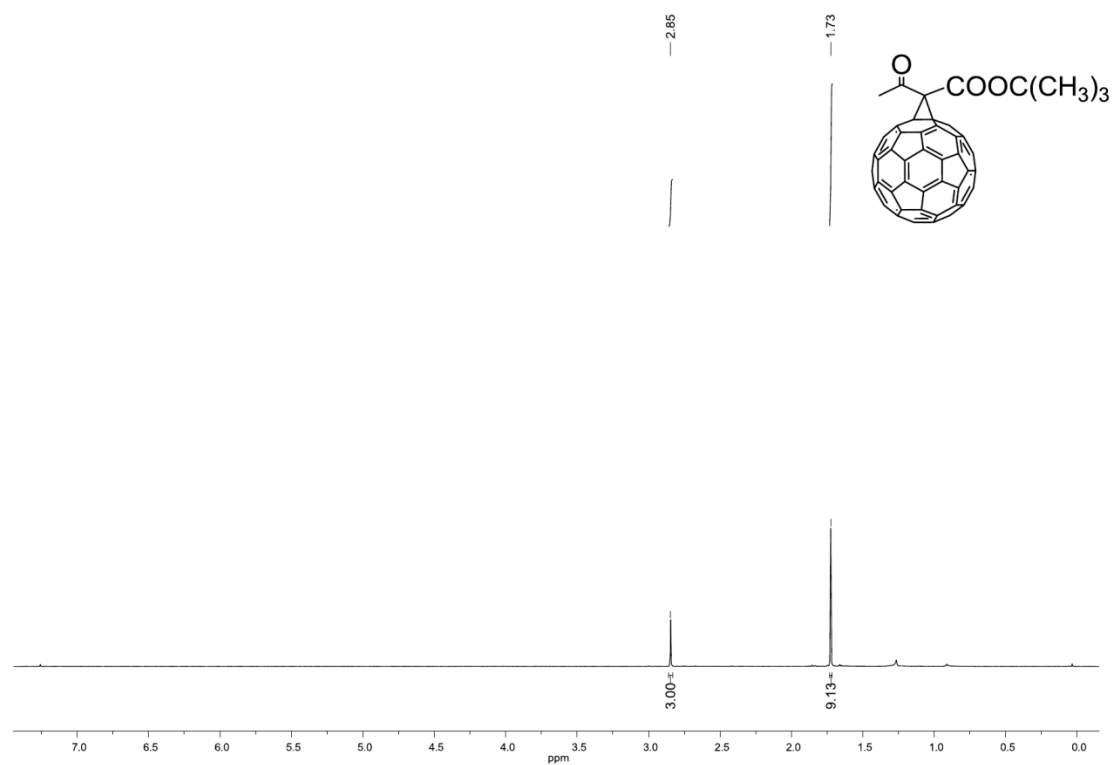

**Figure S35.**  $^1\text{H}$  NMR spectrum (600 MHz) of compound **2e** recorded in  $\text{CS}_2\text{-CDCl}_3$  (v/v=2:1).

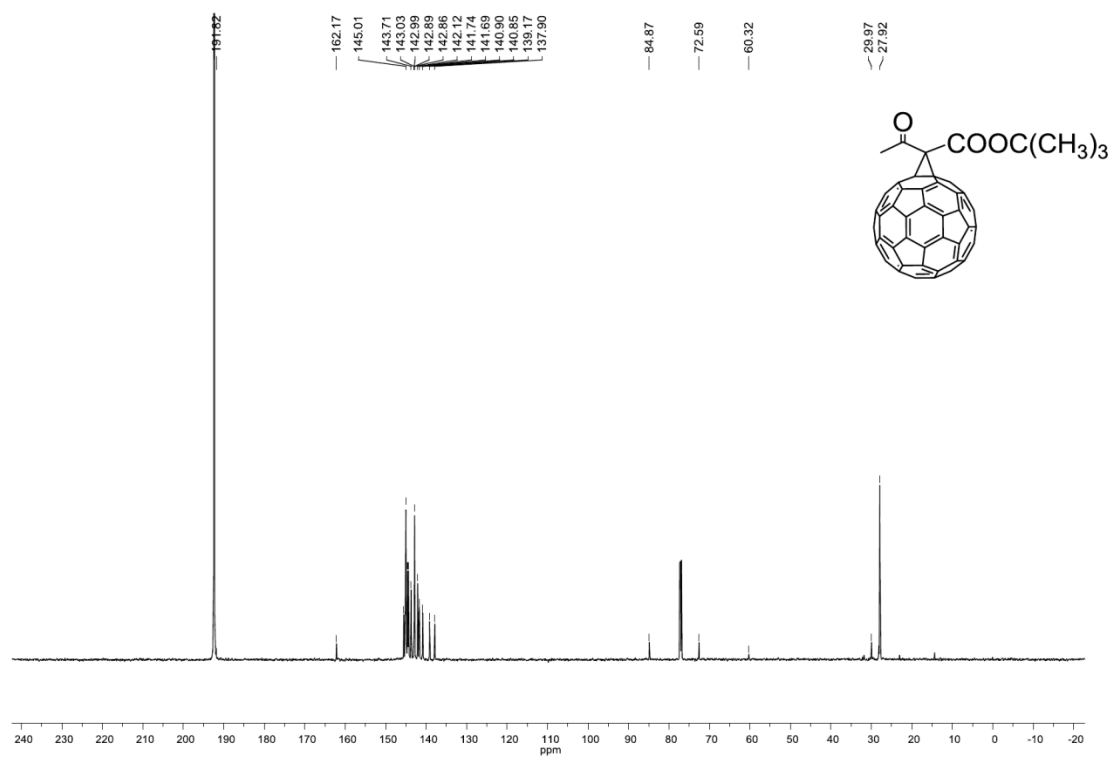

**Figure S36.**  $^{13}\text{C}$  NMR spectrum (151 MHz) of compound **2e** recorded in  $\text{CS}_2\text{-CDCl}_3$  ( $v/v=2:1$ ).

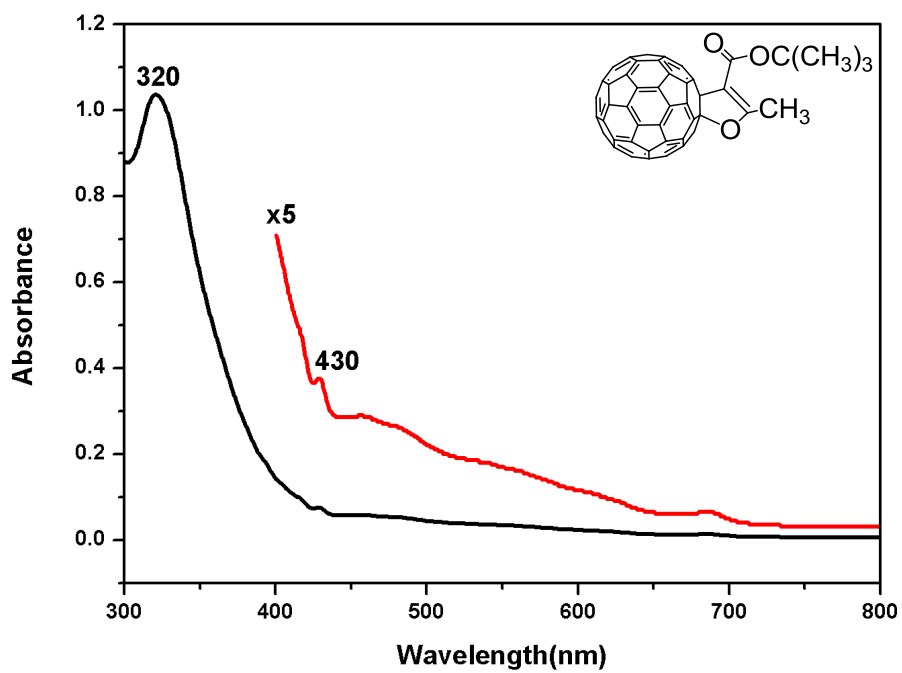

**Figure S37.** UV-visible spectrum of compound **3e** in toluene.



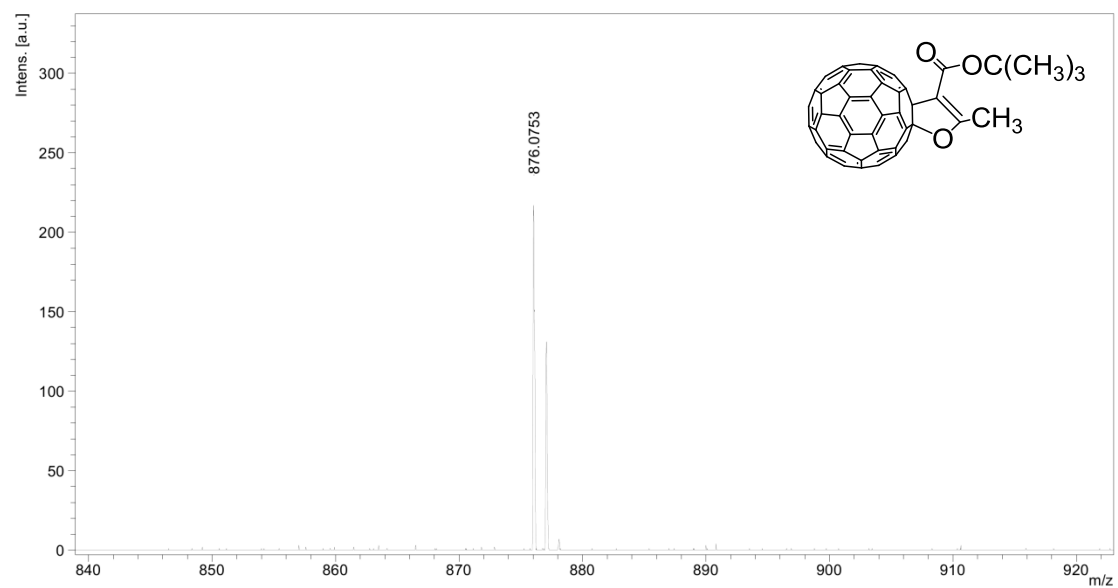

**Figure S38.** MALDI-TOF MS of compound **3e**

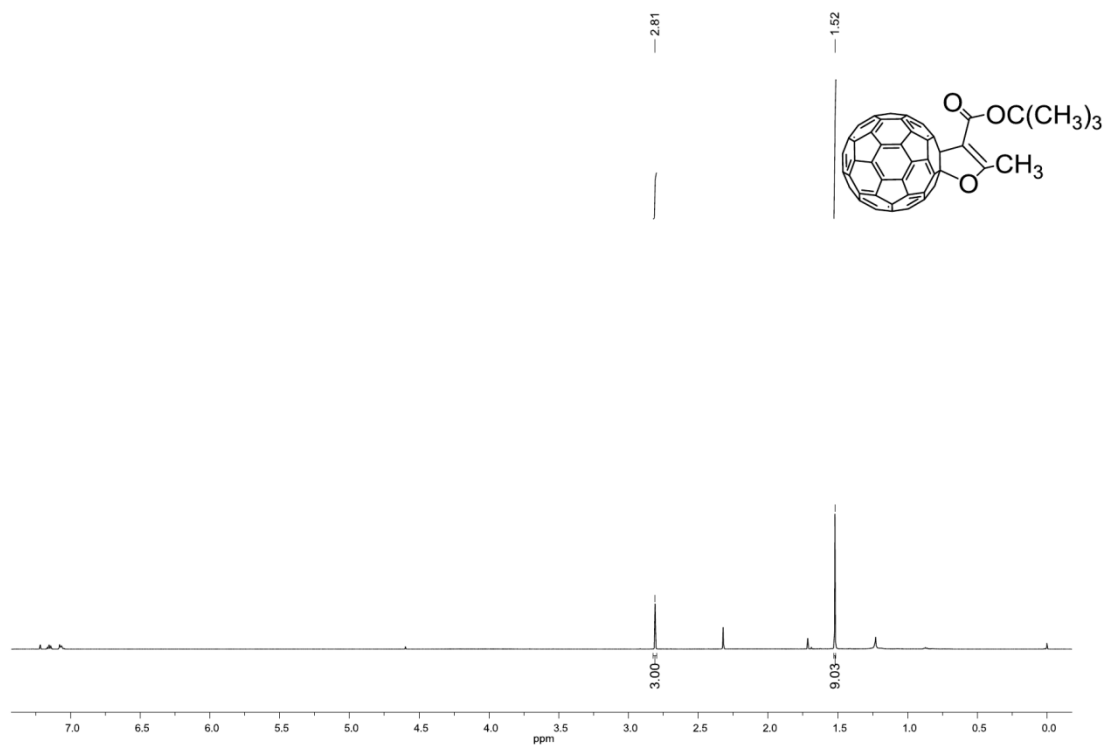

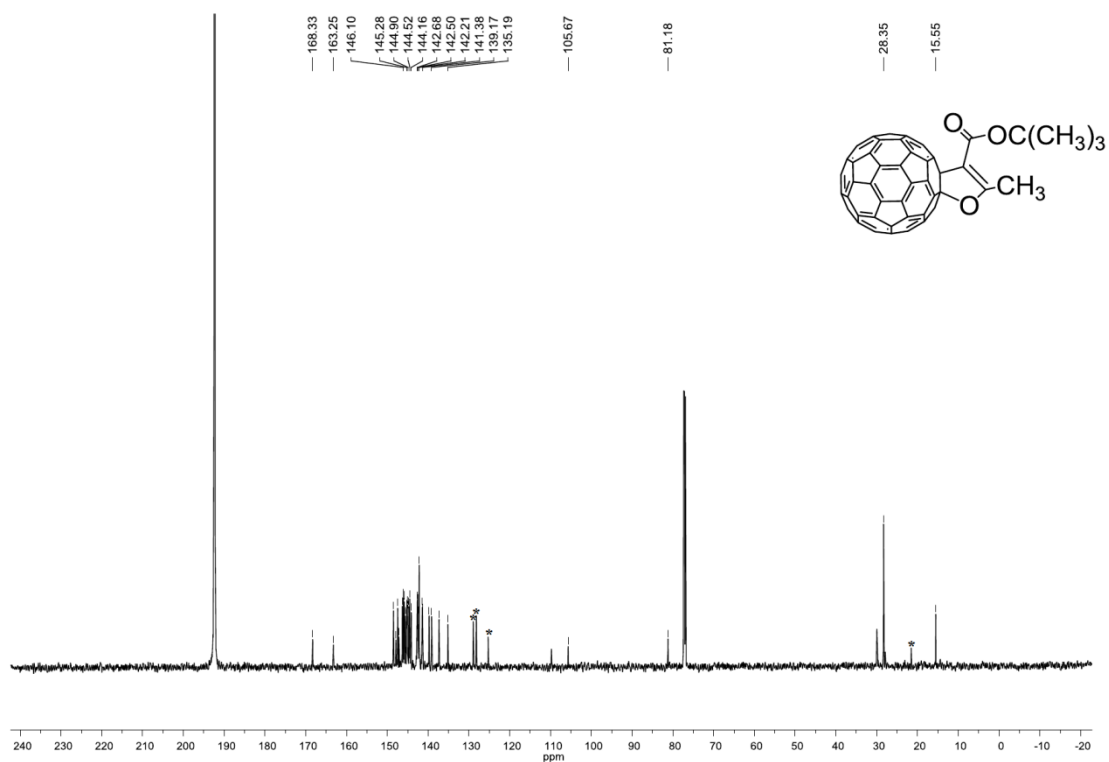

**Figure S40.** <sup>13</sup>C NMR spectrum (151 MHz) of compound **3e** recorded in CS<sub>2</sub>-CDCl<sub>3</sub> (v/v=2:1). The peaks labeled with asterisks belong to toluene residue in the sample.

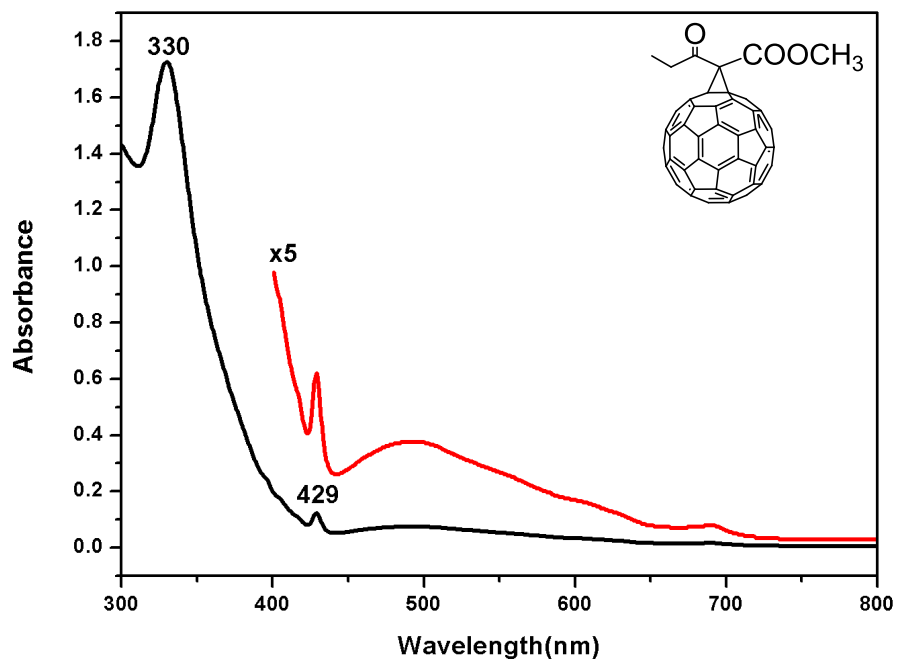

**Figure S41.** UV-visible spectrum of compound **2f** in toluene.

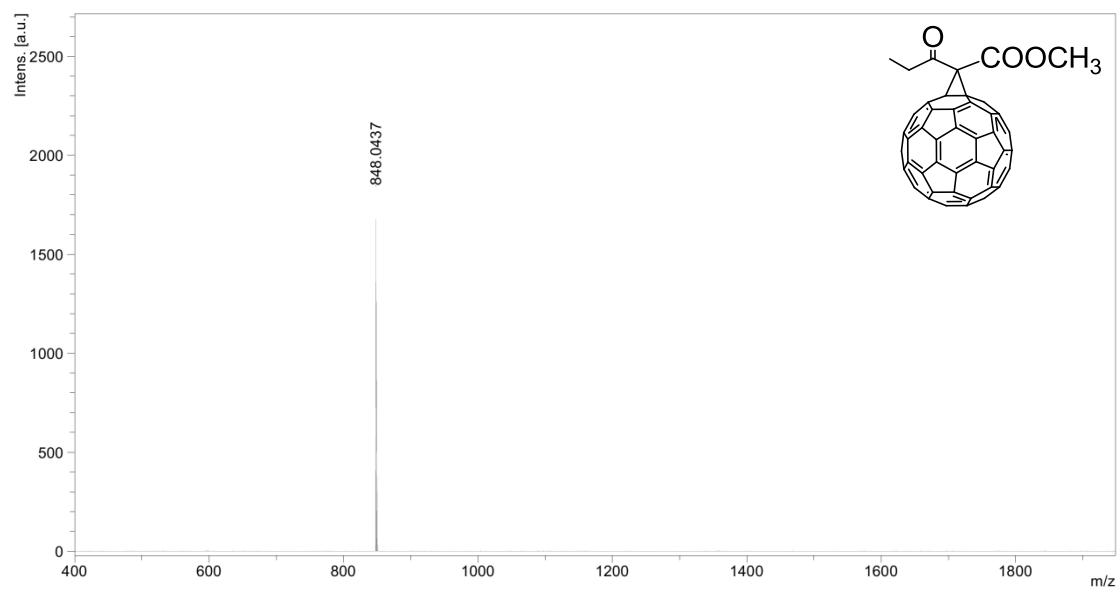

**Figure S42.** MALDI-TOF MS of compound **2f**

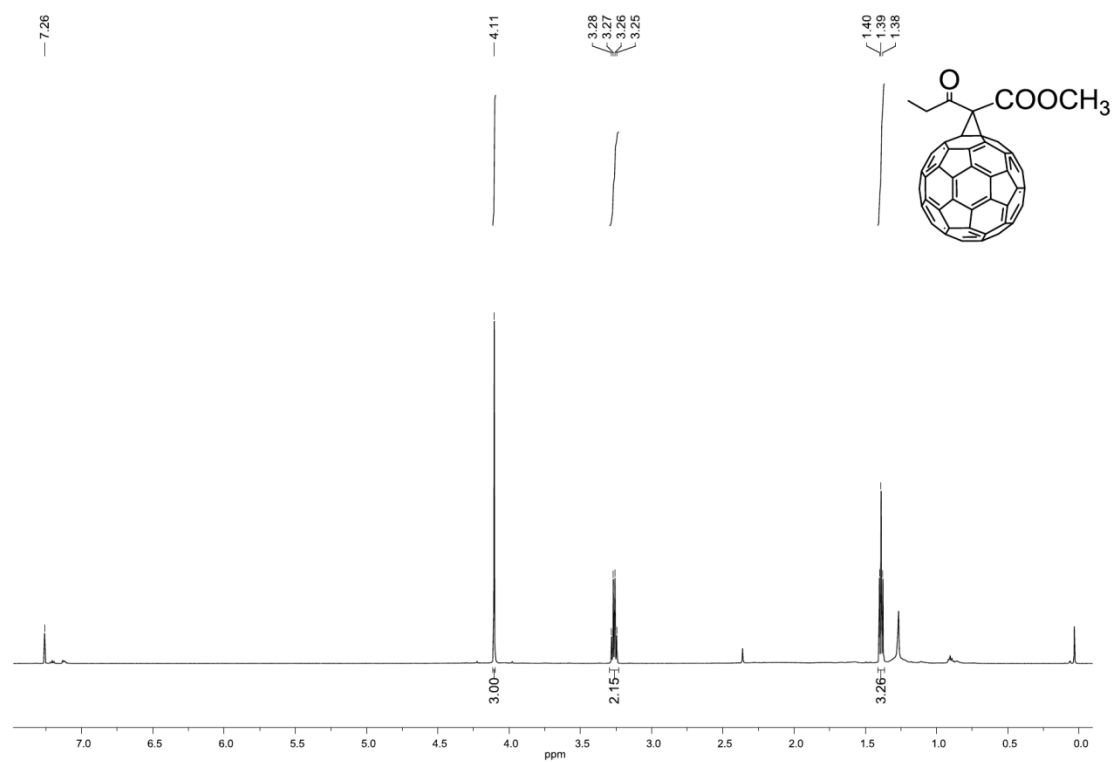

**Figure S43.**  $^1\text{H}$  NMR spectrum (600 MHz) of compound **2f** recorded in  $\text{CS}_2\text{-CDCl}_3$  (v/v=2:1). The resonance at 7.26 ppm is due to the  $\text{CHCl}_3$  solvent.

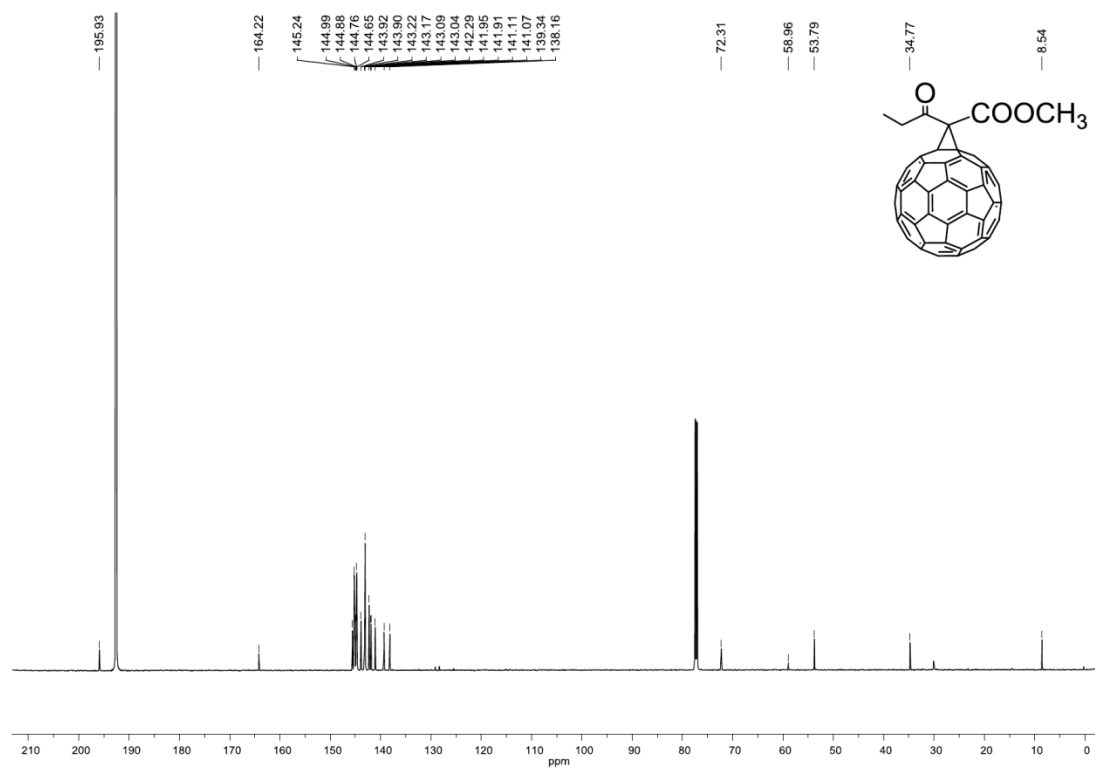

**Figure S44.**  $^{13}\text{C}$  NMR spectrum (151 MHz) of compound **2f** recorded in  $\text{CS}_2\text{-CDCl}_3$  (v/v=2:1).

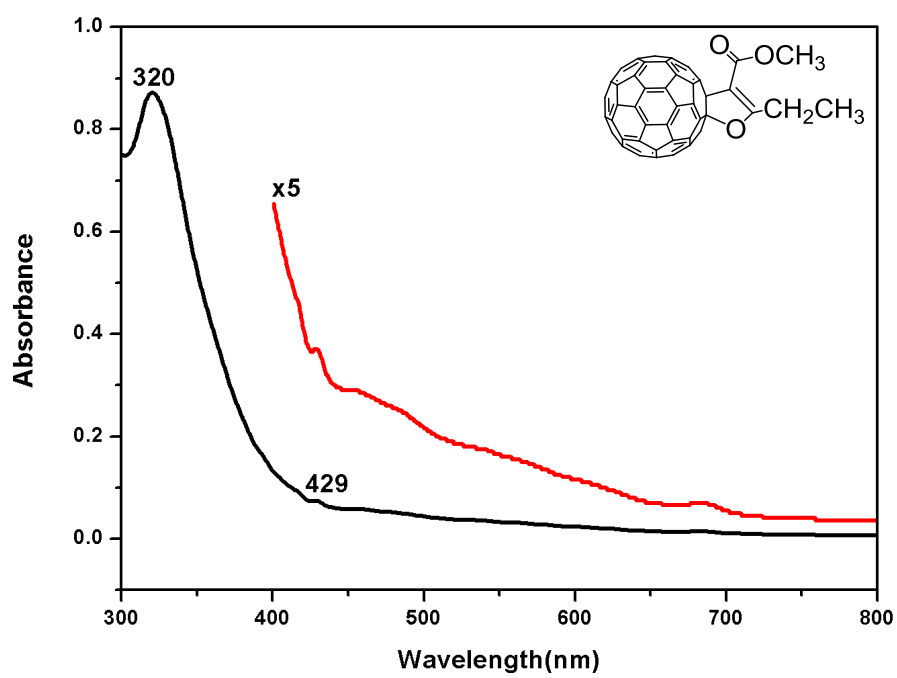

**Figure S45.** UV-visible spectrum of compound **3f** in toluene.



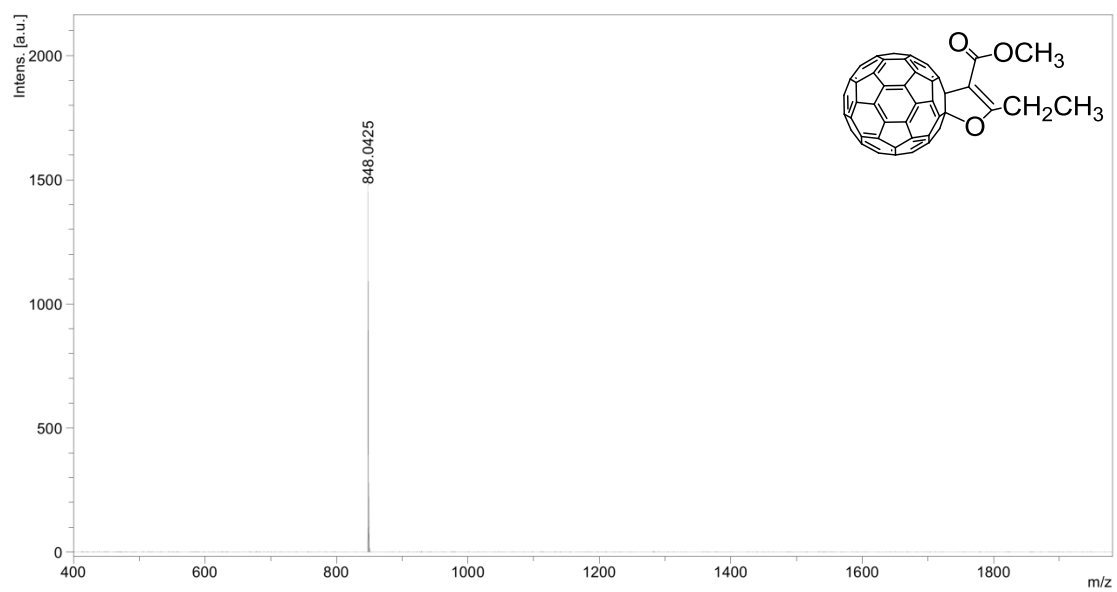

**Figure S46.** MALDI-TOF MS of compound **3f**

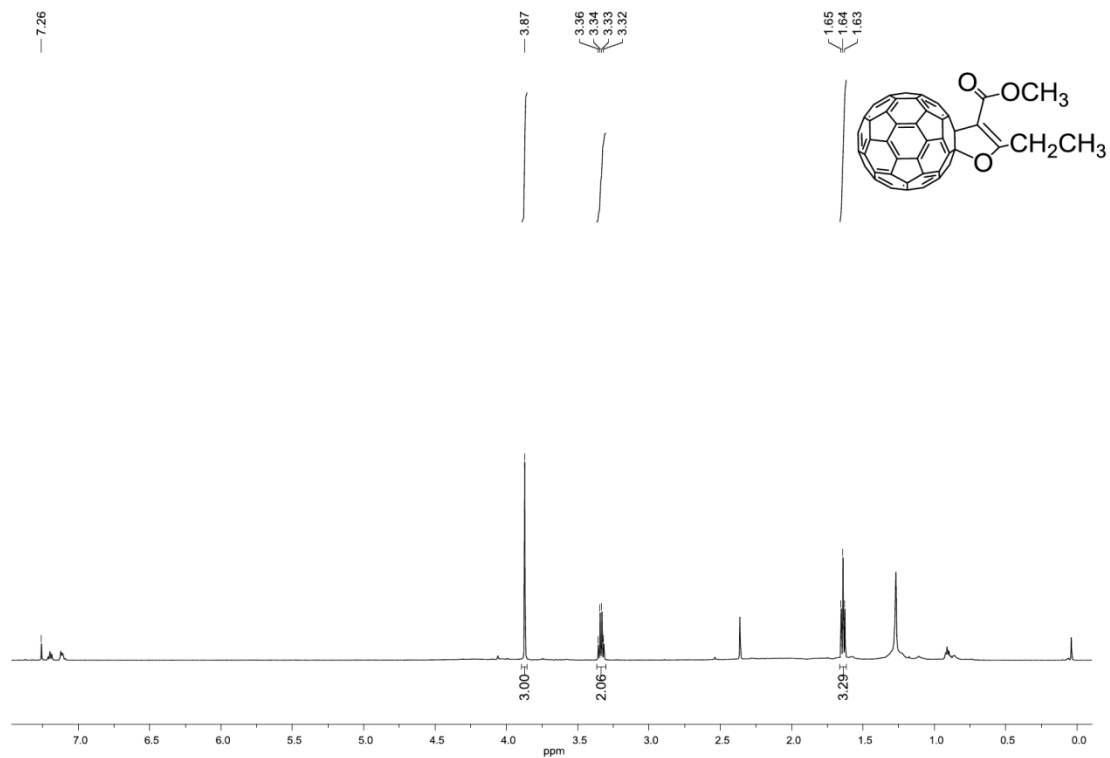

**Figure S47.**  $^1\text{H}$  NMR spectrum (600 MHz) of compound **3f** recorded in  $\text{CS}_2\text{-CDCl}_3$  ( $v/v=2:1$ ). The resonance at 7.26 ppm is due to the  $\text{CHCl}_3$  solvent.

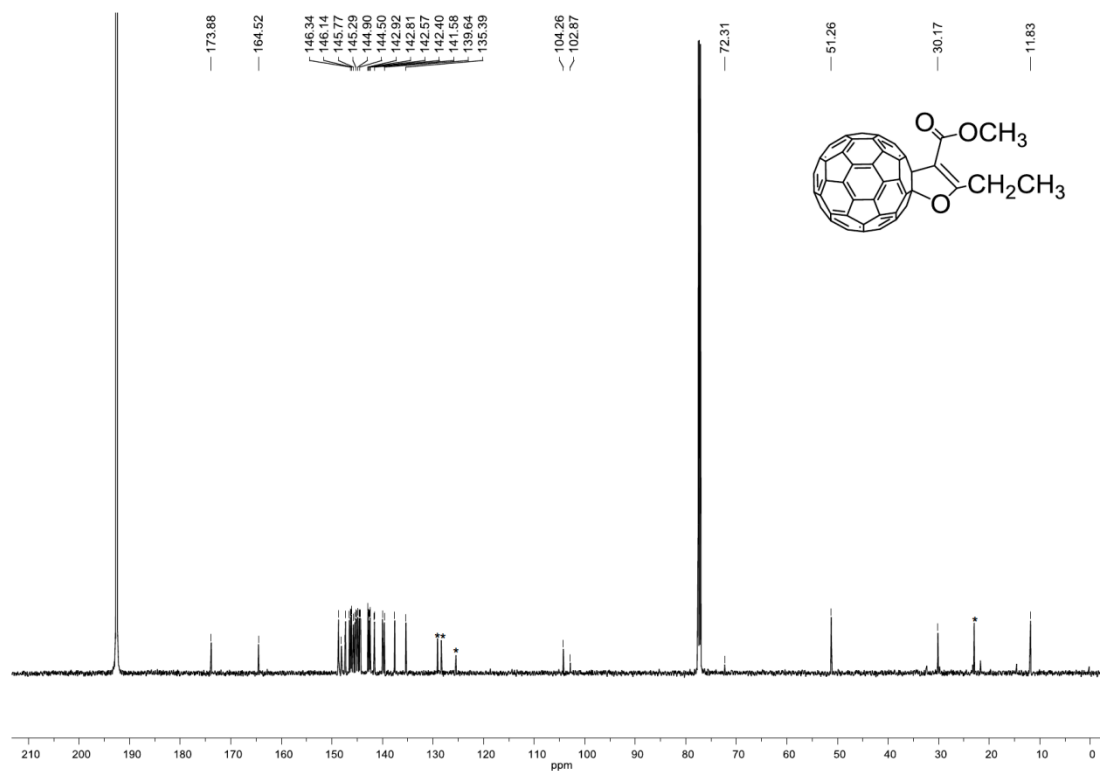

**Figure S48.**  $^{13}\text{C}$  NMR spectrum (151 MHz) of compound **3f** recorded in  $\text{CS}_2\text{-CDCl}_3$  ( $v/v=2:1$ ). The peaks labeled with asterisks belong to toluene residue in the sample.
